# Supplementary material
Source: PubMed Central journal article supplement (PMC4145138)
Supplement: supp_tpc.114.127316_tpc127316_SupplementalData.pdf [file supp_tpc.114.127316_tpc127316_SupplementalData.pdf]

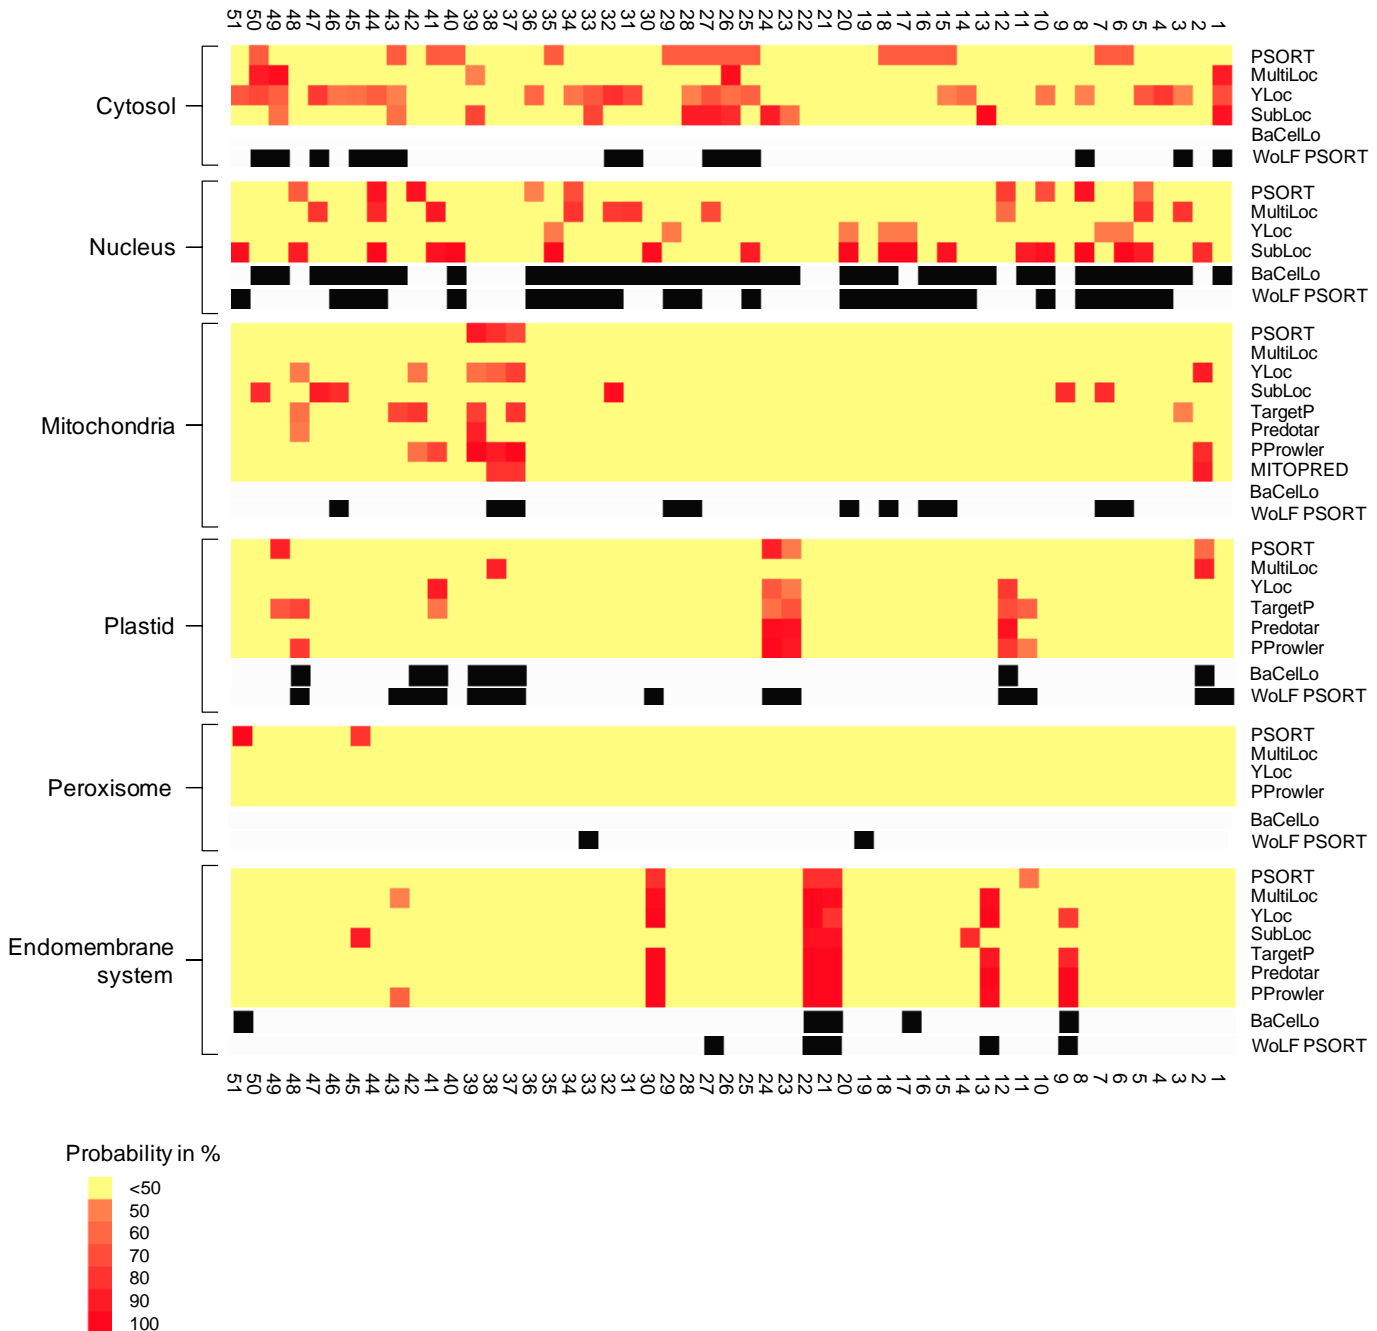

**Supplemental Figure 1. Heatmap of subcellular localization predictions of the 51 Arabidopsis LEA proteins.** The heatmap illustrates probability over 50 % of LEA protein targeting to various cellular compartments given by the different software indicated on the right. LEA proteins are numbered from 1 to 51, and the color coding represents the targeting probability below 50 % (yellow) or between 50 to 100% (red). The two qualitative predictors BaCeLo and WoLF PSORT were included with black square indicating a positive prediction.

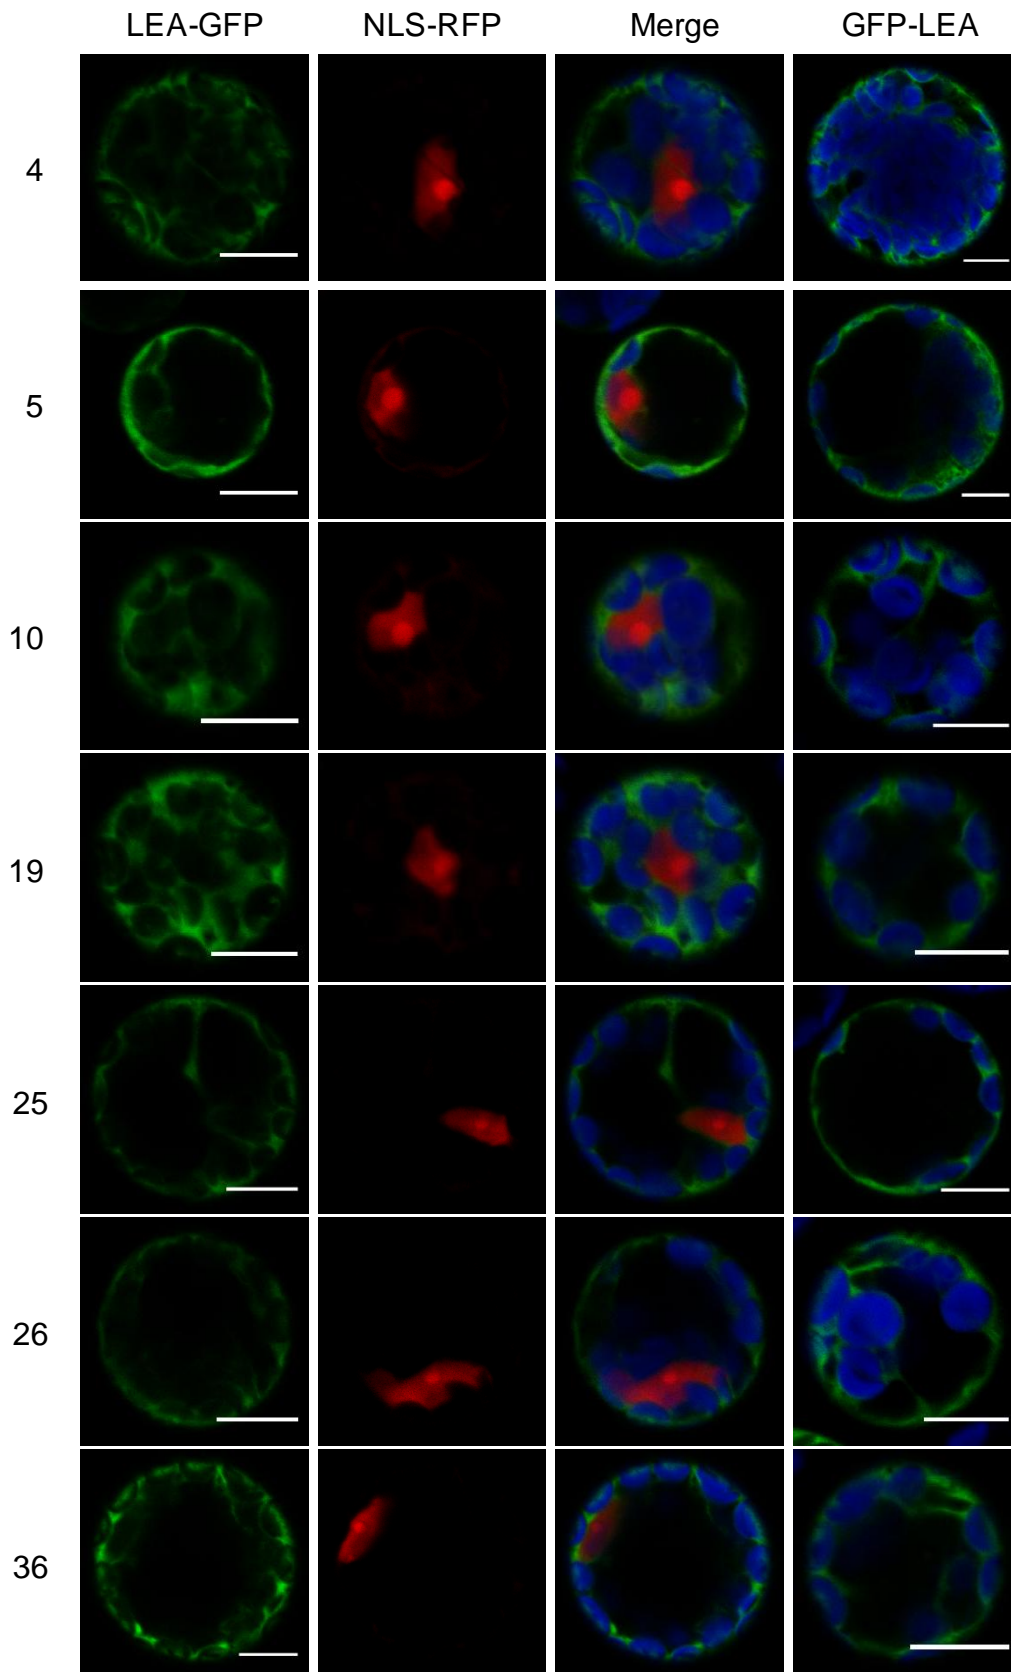

**Supplemental Figure 2. Transient expression of cytosolic LEA protein in Arabidopsis protoplasts.**

Representative examples of LEA-GFP and GFP-LEA fusion proteins localized either in the cytosol only or both in the cytosol and the nucleus were co-expressed with a RFP nuclear marker in Arabidopsis mesophyll protoplasts. Numbers refer to the corresponding LEA proteins. Green, GFP; Red, RFP; Blue, chlorophyll. Bar = 10  $\mu$ m.

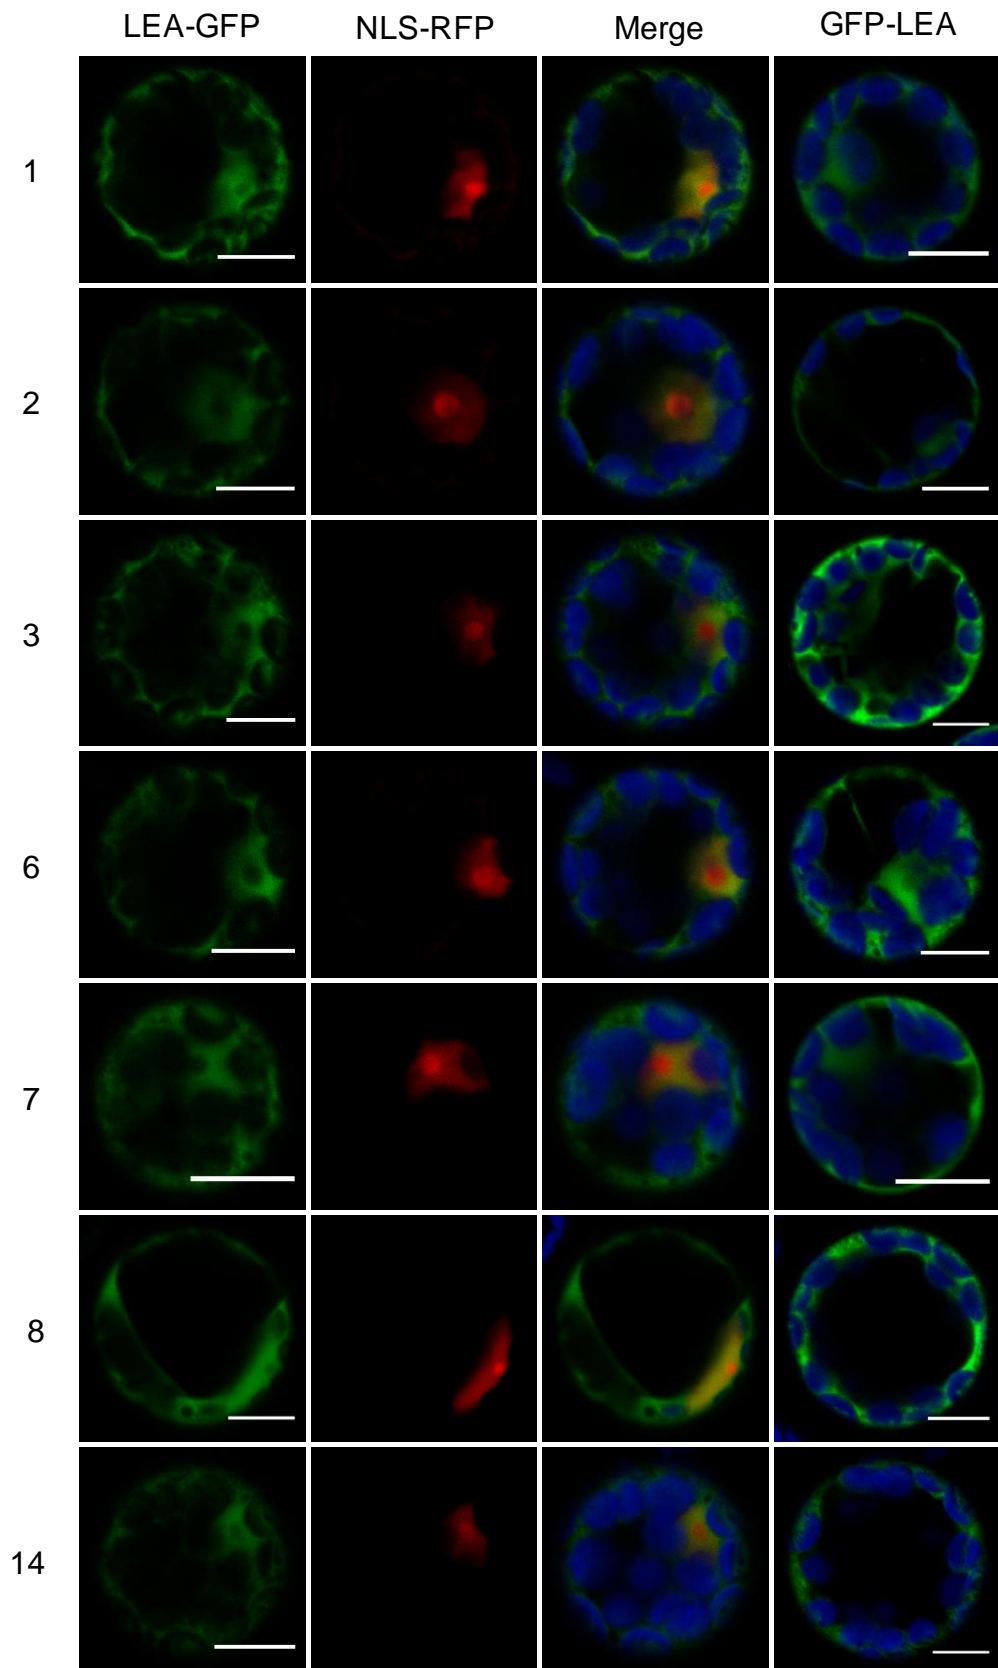

Supplemental Figure 2. (continued).

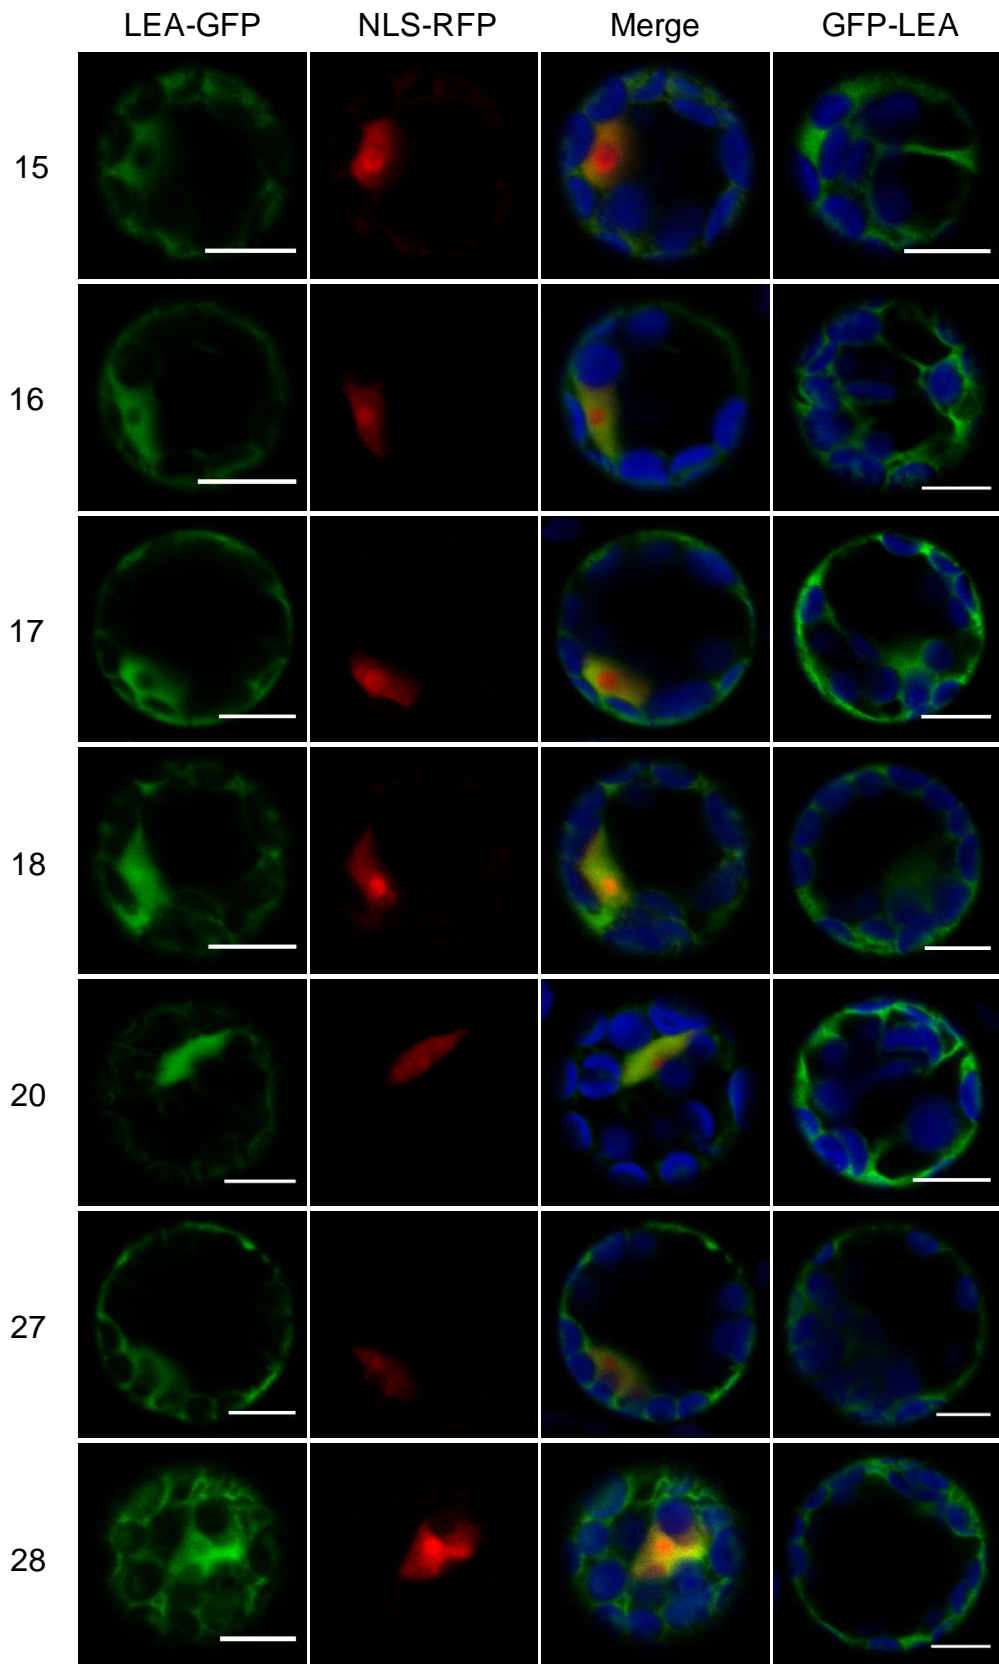

Supplemental Figure 2. (continued).

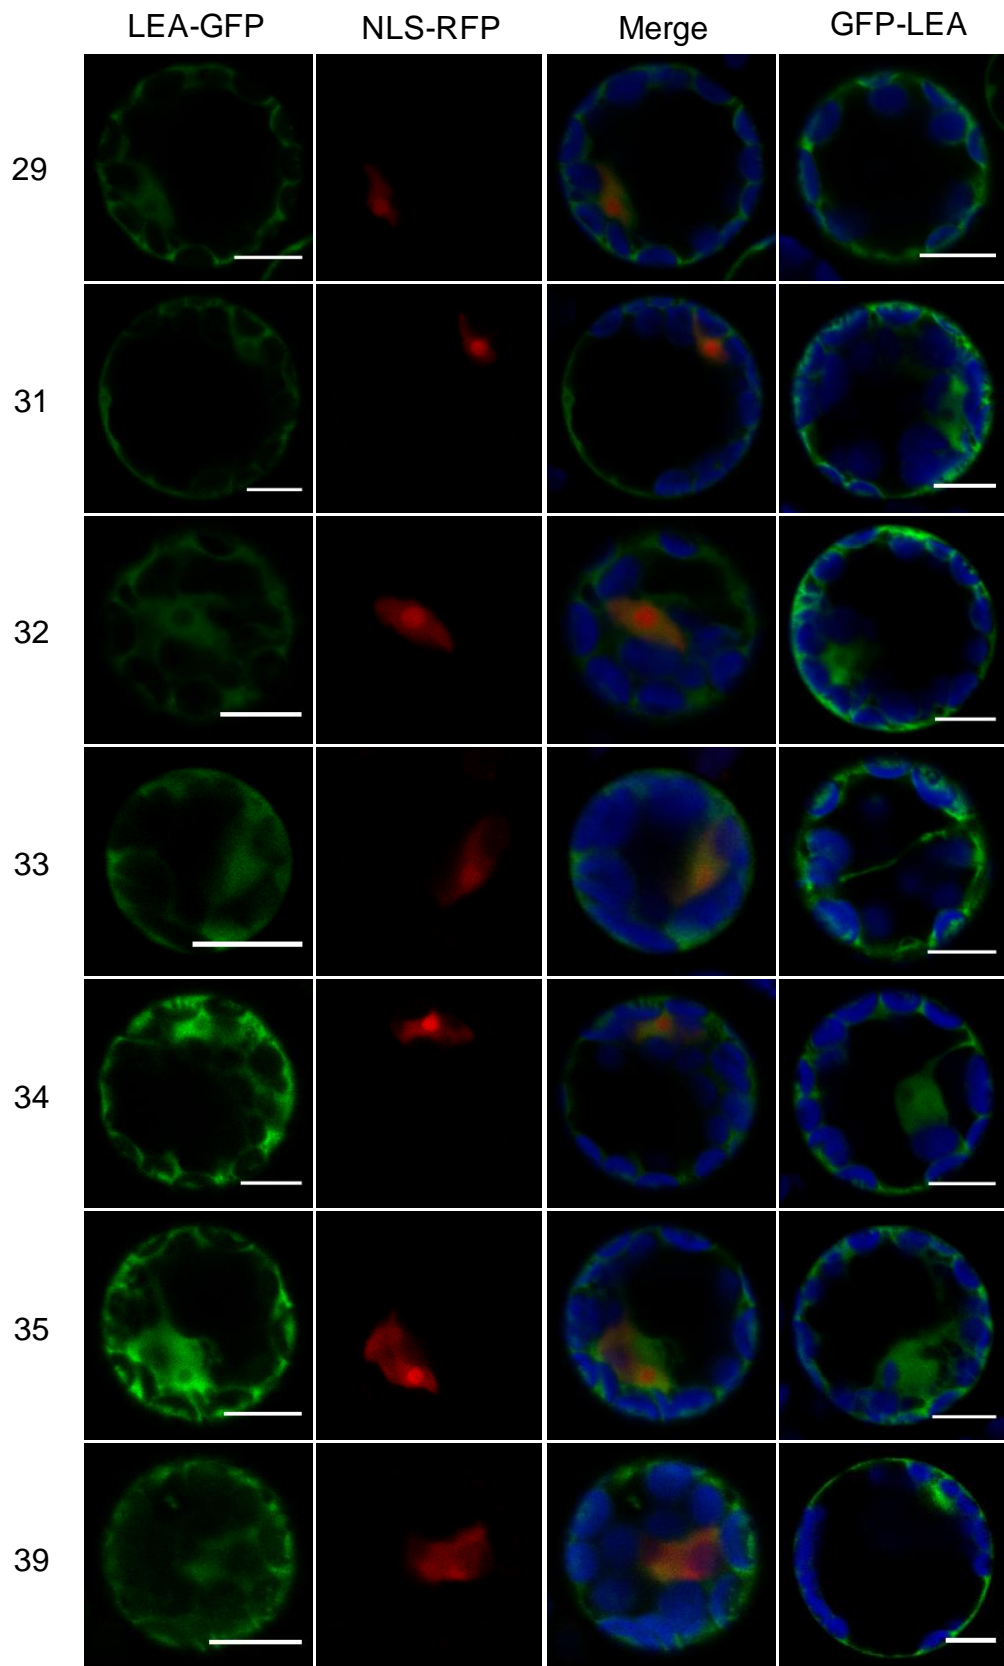

Supplemental Figure 2. (continued).

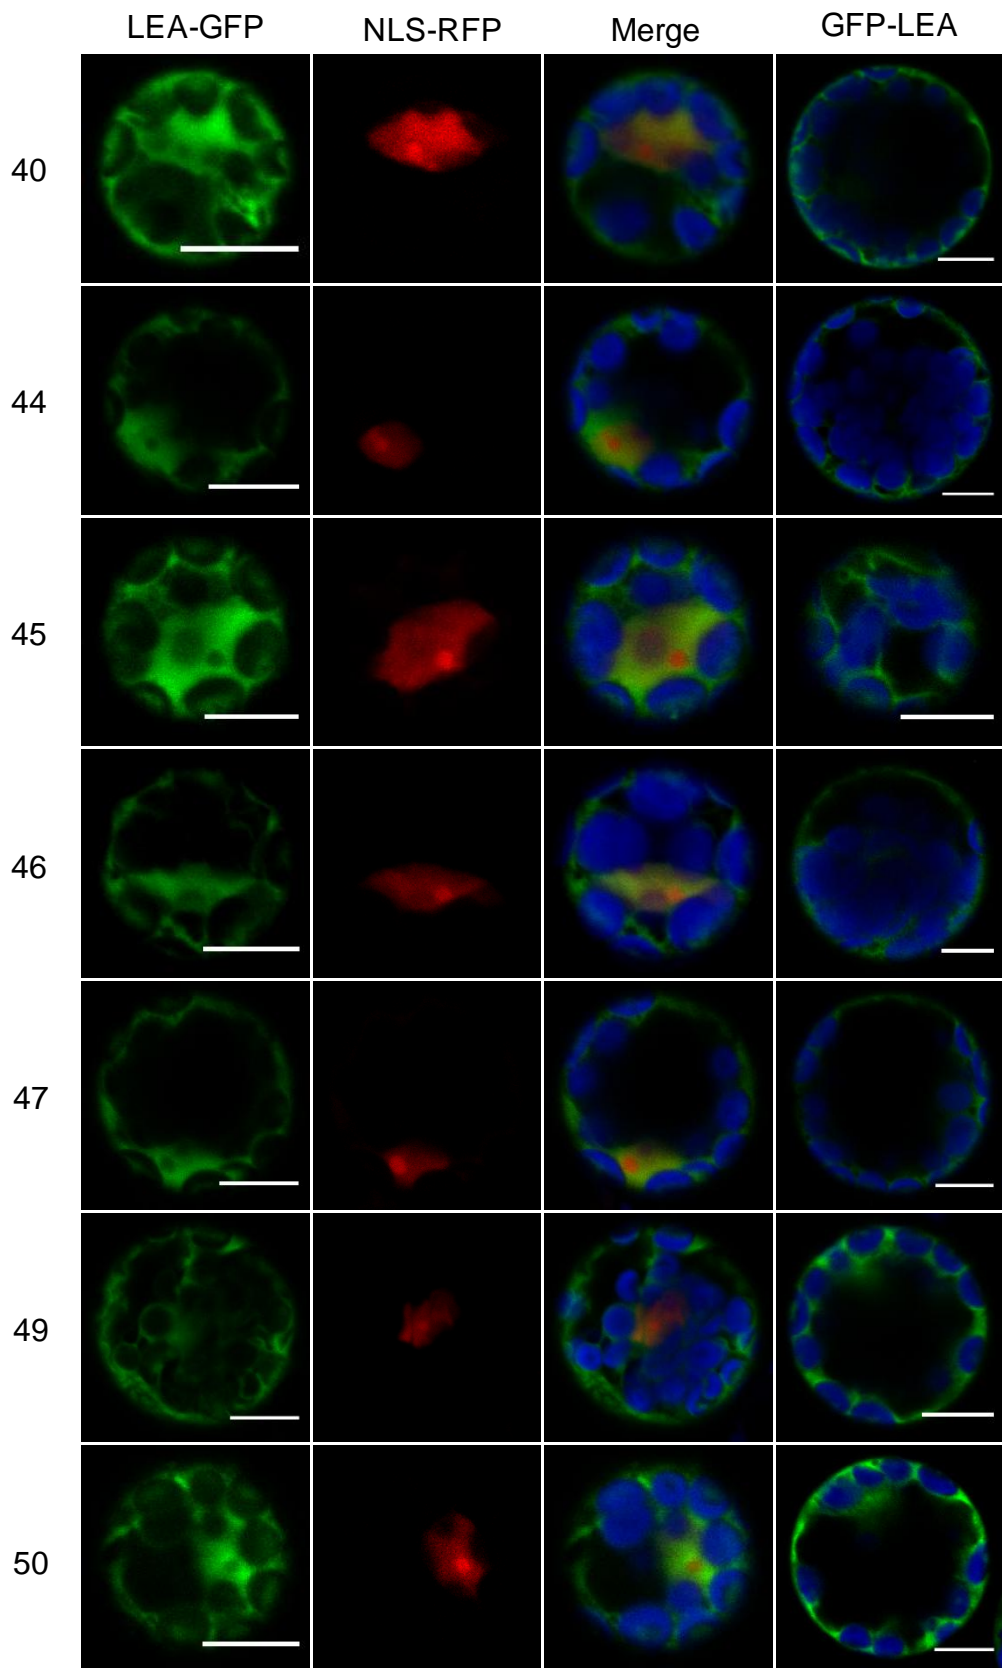

Supplemental Figure 2. (continued).

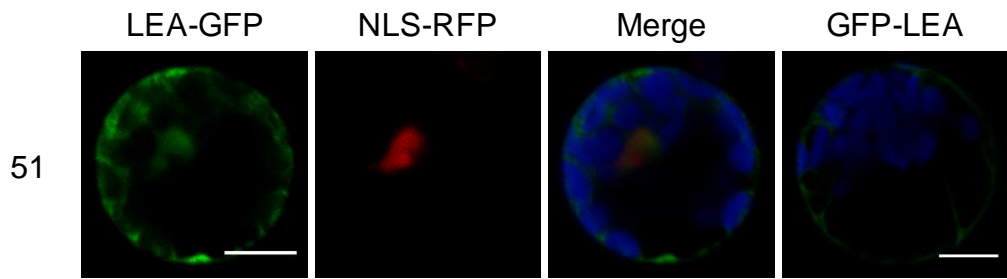

**Supplemental Figure 2.** (continued).

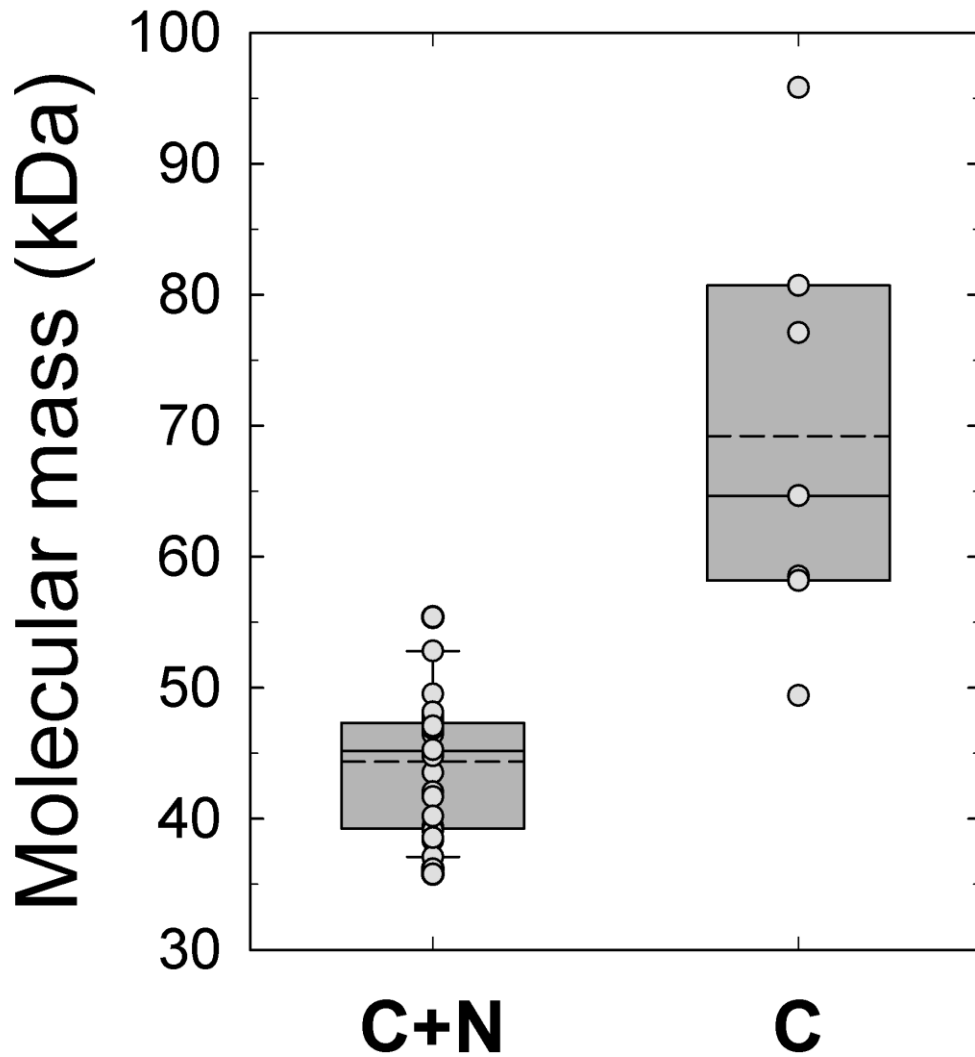

**Supplemental Figure 3. Diffusion of cytosolic LEA-GFP proteins in the nucleus.**

The graph shows the distribution of LEA protein fusions between cytosolic only (C) or cytosolic-nuclear (C+N) compartments as a function of their molecular mass. Each box encloses 50% of the data with the median value of the variable displayed as a line. The mean is indicated as a dashed line. The top and bottom of the box mark the limits of  $\pm 25\%$  of the variable population. The lines extending from the top and bottom of each box mark the minimum and maximum values within the data set that fall within an acceptable range.



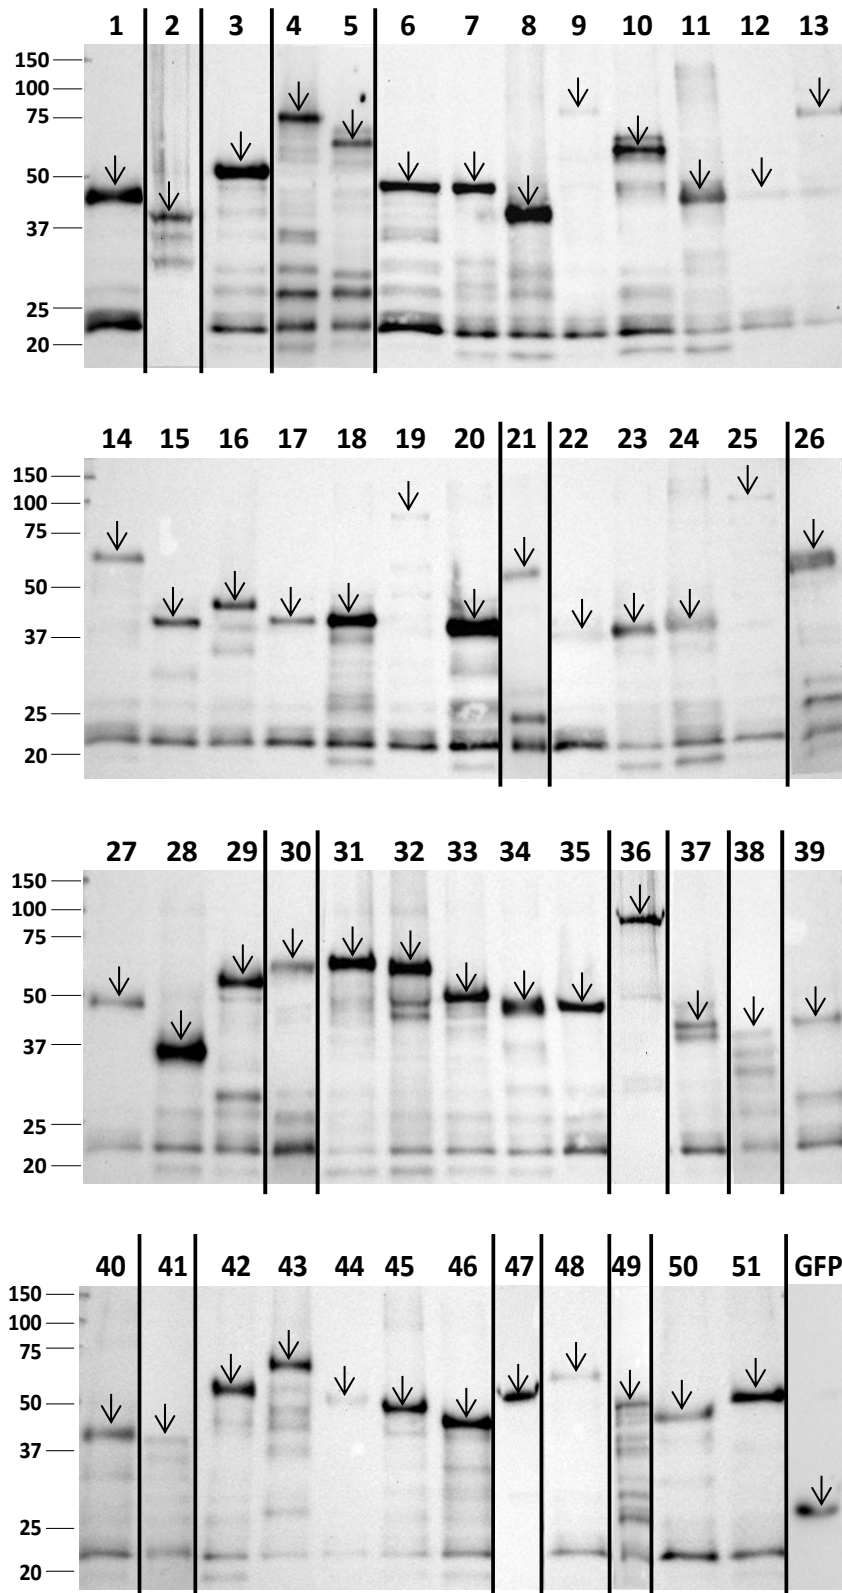

**Supplemental Figure 4. Western blot analysis of LEA protein expressed in protoplasts.**

Total proteins extracted from protoplasts expressing LEA-GFP fusions were separated by SDS-PAGE and transferred on a nylon membrane. LEA-GFP were immuno-detected with a specific anti-GFP antibody. Each LEA protein is indicated by its number. The molecular mass in the scale is in kDa. Lanes between black bars (2, 4, 5, 21, 26, 30, 36, 38, 41, 47 and 49) were obtained from a second western blot analysis and were merged in the figure for more clarity. Arrows indicate the bands of interest.

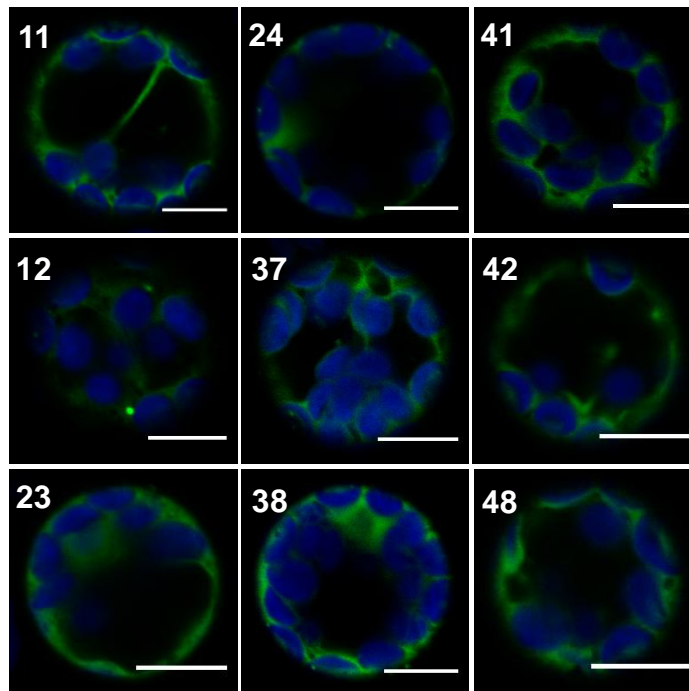

**Supplemental Figure 5. Cytosolic localization of GFP-LEA fusions for proteins localized in mitochondria or plastid when expressed as LEA-GFP fusions (see Figures 3 and 4).**

Representative images of GFP-LEA fusion proteins expressed in wild type *Arabidopsis* mesophyll protoplasts. Numbers refer to different LEA proteins for which LEA-GFP fusions were localized in plastid or mitochondria. Green, GFP; Blue, chlorophyll. Bar = 10  $\mu$ m.

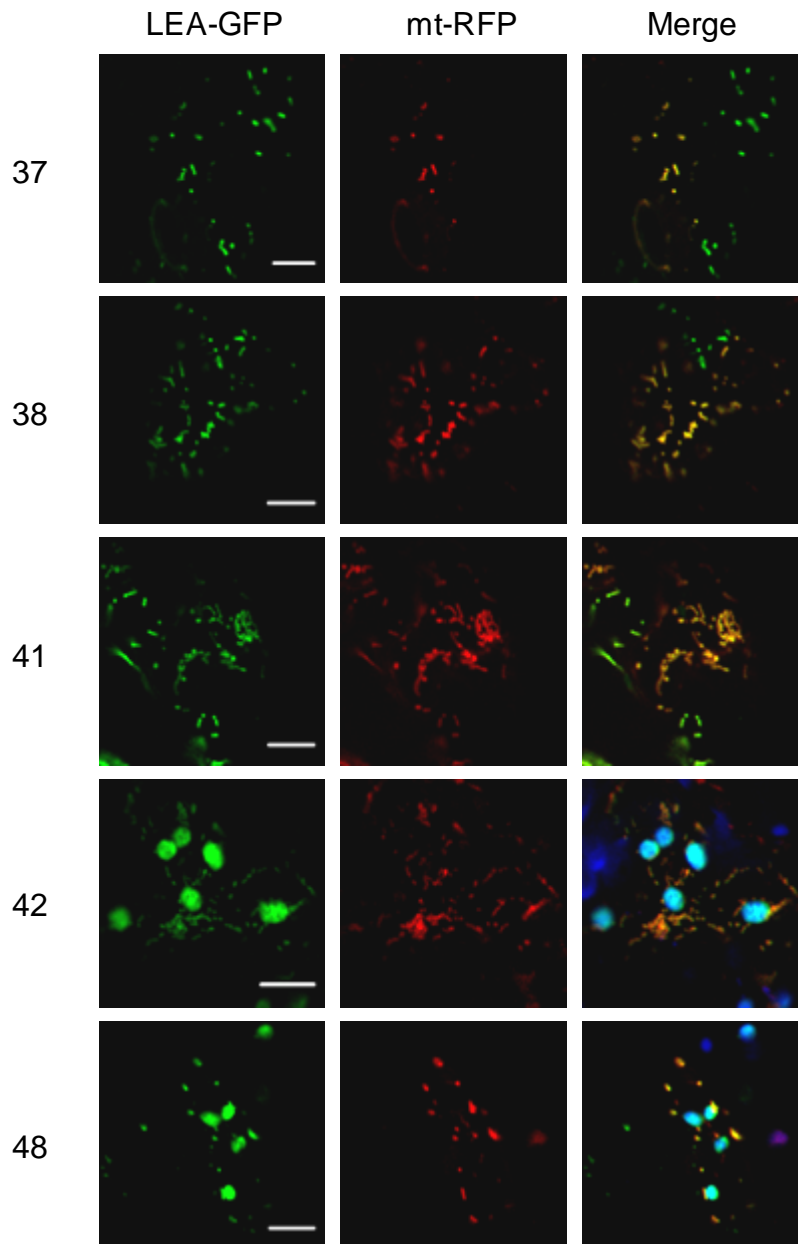

**Supplemental Figure 6. Leaf cells from *Arabidopsis* transgenic lines expressing LEA proteins targeted to mitochondria or dual targeted to mitochondria and plastid.**

Representative images of LEA-GFP fusion proteins expressed in transgenic lines expressing a RFP mitochondrial marker. In the merged images from LEA42 and 48, chlorophyll autofluorescence is also shown (in blue). Numbers refer to different LEA proteins. Green, GFP; Red, RFP; Blue, chlorophyll. Bar = 10  $\mu$ m.

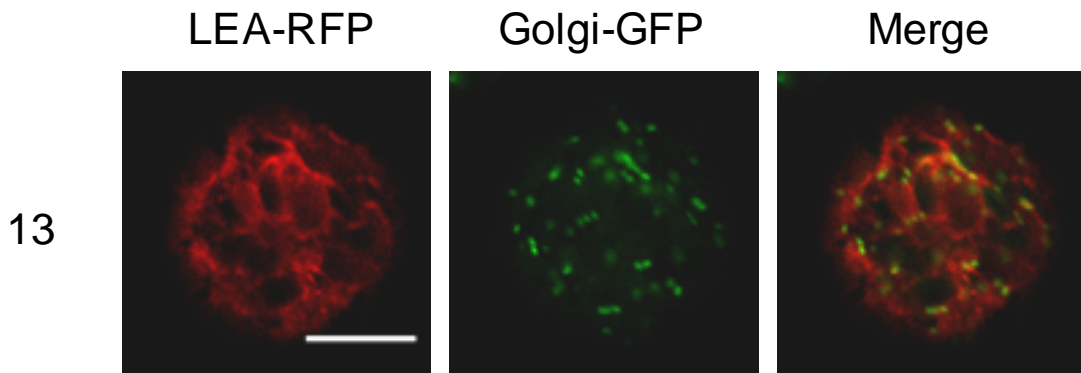

**Supplemental Figure 7. LEA13-RFP does not co-localize with Golgi in Arabidopsis protoplasts.** LEA13-RFP fusion protein was expressed in Arabidopsis mesophyll protoplasts carrying a Golgi marker (GFP). Bar = 10  $\mu$ m.

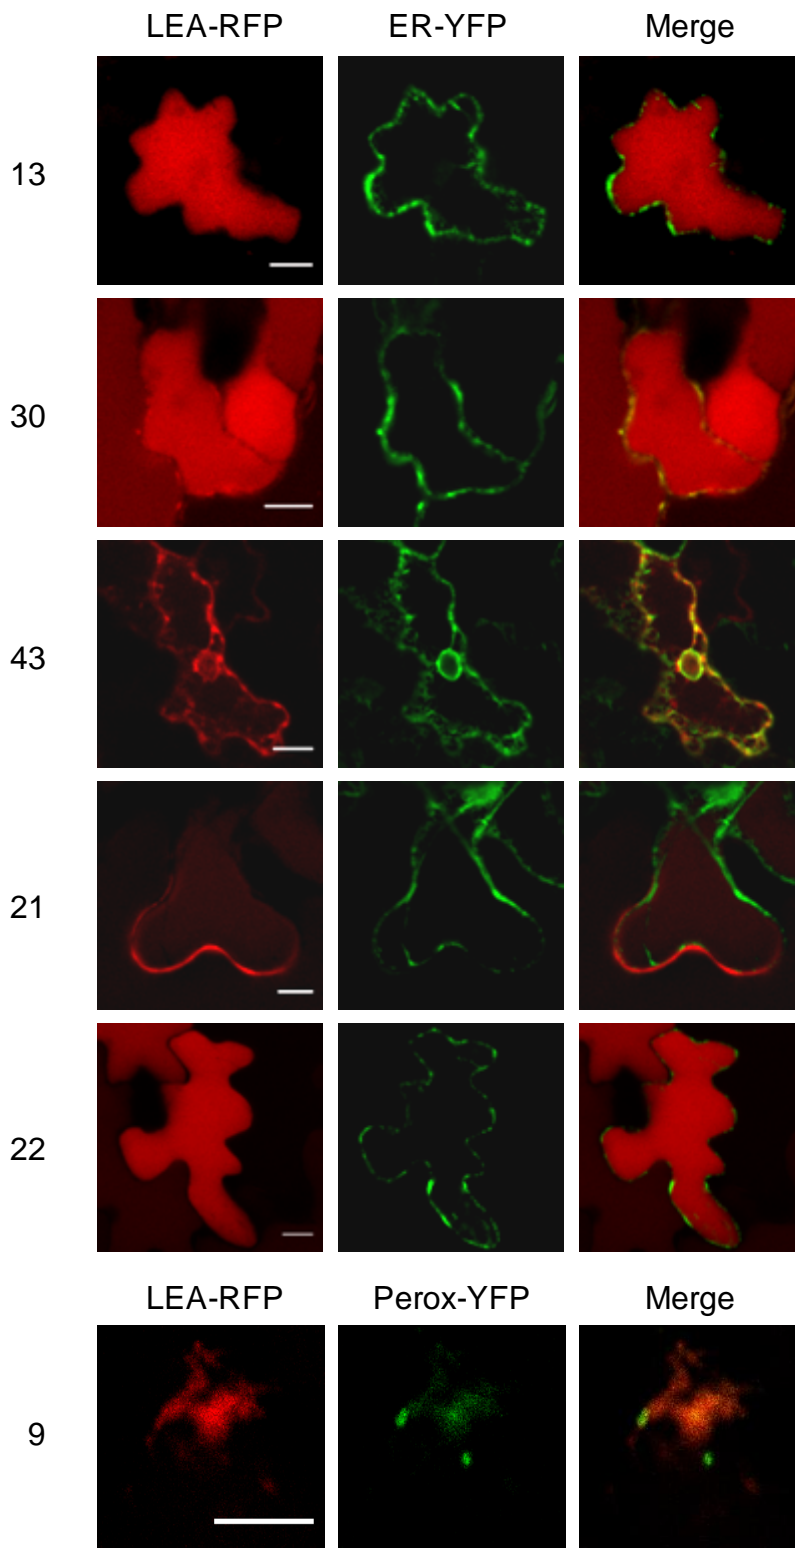

**Supplemental Figure 8. Arabidopsis leaf cells from transgenic lines expressing LEA proteins targeted to the secretory pathway or the pexophagosome.**

Representative images of LEA-RFP fusion proteins expressed in transgenic lines expressing a YFP ER marker (ER-YFP) or a YFP peroxisome marker (Perox-YFP). Numbers refer to different LEA proteins. Green, YFP; Red, RFP. Bar = 10  $\mu$ m.

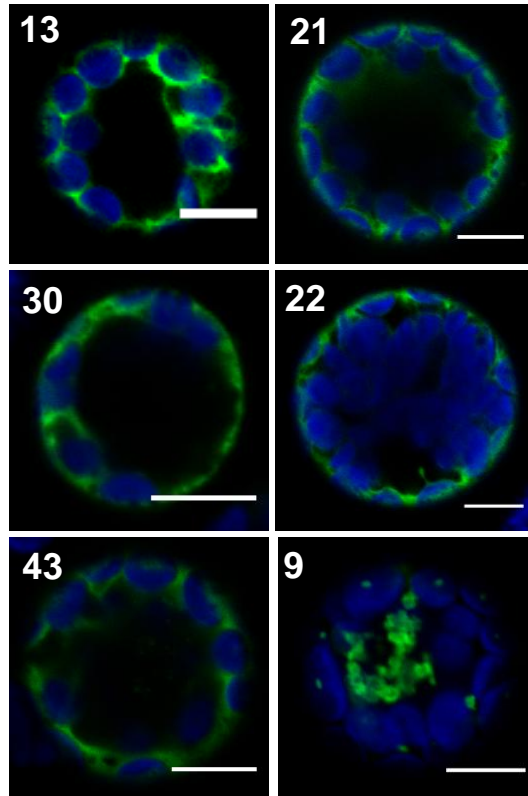

**Supplemental Figure 9. Transient expression in Arabidopsis protoplasts of GFP-LEA fusions for proteins which are targeted to the secretory pathway as LEA-GFP fusions.** Representative images of GFP-LEA fusion proteins expressed in wild type Arabidopsis mesophyll protoplasts. Numbers refer to different LEA proteins for which LEA-GFP fusions were targeted to the secretory pathway. Green, GFP; Blue, chlorophyll. Bar = 10 μm.

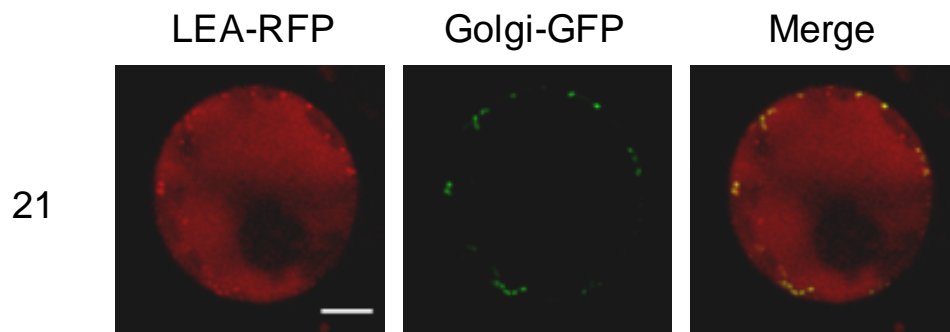

**Supplemental Figure 10. Vacuolar and Golgi localization of LEA 21 in Arabidopsis protoplasts.** LEA21-RFP fusion protein was expressed in Arabidopsis mesophyll protoplasts carrying a Golgi marker (GFP). Bar = 10  $\mu$ m.

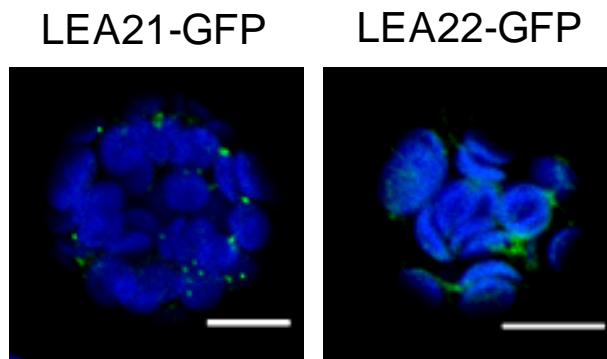

**Supplemental Figure 11. Localization of LEA 21-GFP and LEA22-GFP in Arabidopsis protoplasts.** GFP fusion protein was expressed in wild type Arabidopsis mesophyll protoplasts. In the case of LEA22-GFP, the fluorescence signal was very weak. Bar = 10  $\mu$ m.



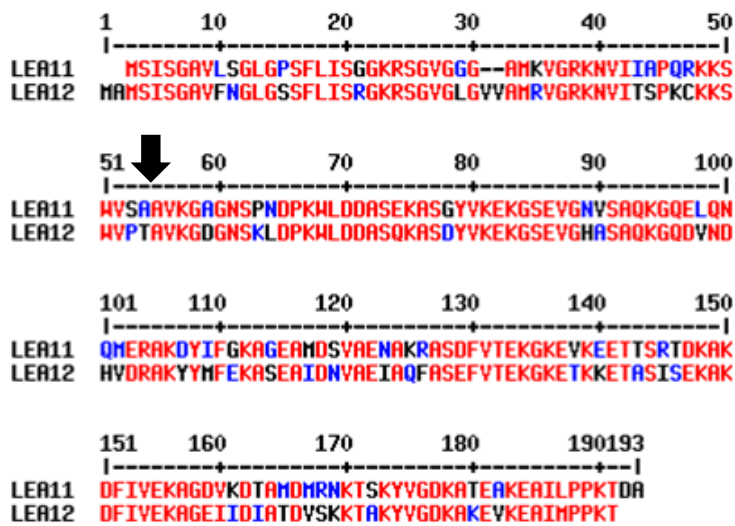

**Supplemental Figure 12. LEA11 and LEA12 sequence alignment.** Sequences were aligned using the MultAlin software (<http://multalin.toulouse.inra.fr/multalin/>) using default parameters. The targeting peptide cleavage site of LEA11 is indicated with a black arrow.

| ER (6)   | False positive | Correct prediction |
|----------|----------------|--------------------|
| PProwler | 0              | 6                  |
| MultiLoc | 0              | 5                  |
| Yloc     | 0              | 5                  |
| TargetP  | 0              | 5                  |
| Predotar | 0              | 5                  |
| PSORT    | 1              | 3                  |
| SubLoc   | 2              | 2                  |

| Mitochondria (5) | False positive | Correct prediction |
|------------------|----------------|--------------------|
| PProwler         | 2              | 4                  |
| Yloc             | 2              | 4                  |
| TargetP          | 3              | 3                  |
| PSORT            | 1              | 2                  |
| MITOPRED         | 1              | 2                  |
| Predotar         | 1              | 1                  |
| MultiLoc         | 0              | 0                  |
| SubLoc           | 6              | 0                  |

| Plastid (6) | False positive | Correct prediction |
|-------------|----------------|--------------------|
| PProwler    | 0              | 5                  |
| TargetP     | 2              | 5                  |
| Predotar    | 0              | 3                  |
| Yloc        | 1              | 3                  |
| PSORT       | 2              | 2                  |
| MultiLoc    | 2              | 0                  |

| Cytosol (36) | False positive | Correct prediction |
|--------------|----------------|--------------------|
| Yloc         | 1              | 24                 |
| PSORT        | 2              | 14                 |
| SubLoc       | 3              | 7                  |
| MultiLoc     | 0              | 5                  |

**Supplemental Figure 13. Estimation of prediction software efficiency.** The bar graph shows the number of proteins with correct or false predictions by the different software. For each compartment, the total number of experimentally identified proteins is indicated between brackets. Correct predictions were achieved when the experimental subcellular localization matched with the prediction. False positives correspond to erroneous subcellular compartment attribution with a strong prediction.

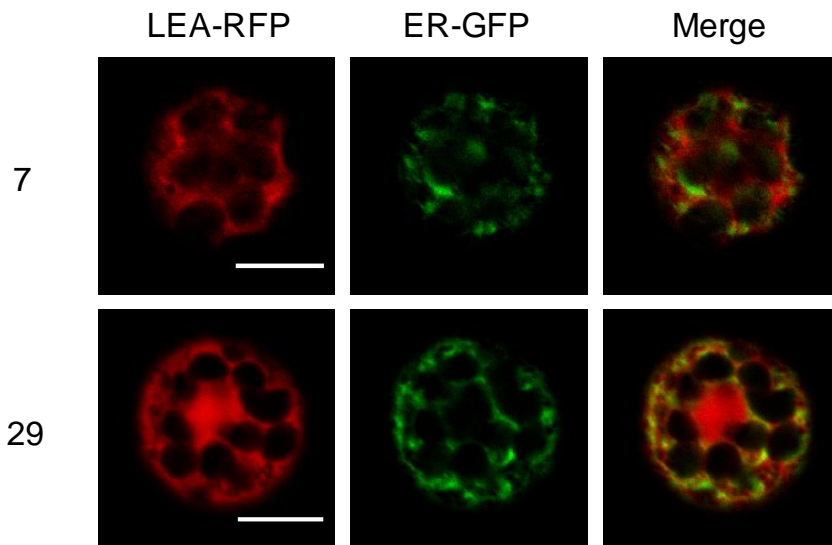

**Supplemental Figure 14. Cytosolic localization of LEA7 and LEA29 in Arabidopsis protoplasts.** LEA-RFP fusion proteins were expressed in Arabidopsis mesophyll protoplasts carrying a ER marker (GFP). Bar = 10  $\mu$ m.

| LEA# | Loc | ID        | Cell culture | Flowers | Leaves | Pollen | Roots | Seedling shoots | Seeds | Siliques |
|------|-----|-----------|--------------|---------|--------|--------|-------|-----------------|-------|----------|
| 1    | C   | At1g01470 | -1.31        | -1.72   | 0.94   |        | 1.64  | 0.45            | 2.81  | 0.19     |
| 2    | C   | At1g02820 |              | -2.31   |        |        |       |                 |       |          |
| 3    | C   | At1g03120 | -3.9         | -1.09   |        | -0.6   |       |                 |       | -2.2     |
| 4    | C   | At1g20440 |              | 3.55    | 4.57   |        | 6.1   | 1.26            |       | 2.58     |
| 5    | C   | At1g20450 | -1.34        | 2.23    | 2.58   |        | 2.68  | -0.62           |       | 0.8      |
| 6    | C   | At1g32560 |              |         |        |        |       |                 | -1.65 |          |
| 7    | C   | At1g52690 |              | 2.5     | -2.44  |        | -2.23 |                 | 1.97  |          |
| 8    | C   | At1g54410 |              | 1.4     | 0.85   | -0.5   | 3.63  | 0.51            |       | 0.29     |
| 9    | Pxp | At1g72100 |              |         |        |        |       |                 | 1.06  |          |
| 10   | C   | At1g76180 | -3.9         | 4.68    | 5.19   |        | 5.41  | 1.18            |       | 5.85     |
| 11   | P   | At2g03740 |              | 1.79    |        |        |       |                 |       |          |
| 12   | P   | At2g03850 |              | 1.6     |        |        |       |                 |       |          |
| 13   | ER  | At2g18340 |              |         |        | -0.22  |       |                 | -2.14 |          |
| 14   | C   | At2g21490 |              | -1.31   |        |        |       |                 | 1.16  |          |
| 15   | C   | At2g23110 |              |         | -3.55  | -2.31  |       |                 |       |          |
| 16   | C   | At2g23120 |              | 6.58    | 6.18   | 0.5    | 6.44  |                 |       | 7.38     |
| 17   | C   | At2g33690 |              | 2.5     |        | 0.18   |       |                 |       |          |
| 18   | C   | At2g35300 |              | -0.57   |        |        |       |                 |       |          |
| 19   | C   | At2g36640 |              |         |        |        |       |                 | 0.63  | -4.38    |
| 20   | C   | At2g40170 |              |         |        |        |       |                 | 1.56  |          |
| 21   | V   | At2g41260 |              |         |        |        |       |                 | -0.65 |          |
| 22   | V   | At2g41280 |              |         |        |        |       |                 | 0.09  |          |
| 23   | P   | At2g42530 | -3.45        | 6.26    | 4.22   |        |       |                 |       | 6.27     |
| 24   | P   | At2g42540 | -3.58        | 3.97    | 2.43   |        |       | -2.4            |       | 3.58     |
| 25   | C   | At2g42560 |              |         |        |        |       |                 | 4.63  |          |
| 26   | C   | At2g44060 | 2.85         | 2.45    | 2.07   | 2.39   | 4.1   | 2.23            | -2.24 | 3.04     |
| 27   | C   | At2g46140 | -0.16        | 1.8     |        | 3.39   | 2.45  |                 |       | 0.99     |
| 28   | C   | At3g02480 |              | 7.45    | 2.58   | 3.78   | -1.02 |                 | 3.13  | 3.35     |
| 29   | C   | At3g15670 |              | -2.99   | -4.74  |        |       |                 | 5.87  |          |
| 30   | ER  | At3g17520 |              | -0.62   | -4.83  |        |       |                 | 3.38  | -2.38    |
| 31   | C   | At3g22490 |              |         |        | -3.59  |       |                 | 0.83  |          |
| 32   | C   | At3g22500 |              | -4.08   | -4.83  |        |       |                 | 2.11  |          |
| 33   | C   | At3g50970 |              | 0.33    | 0.51   |        | 3.14  | -1.82           | 2.13  | -2.3     |
| 34   | C   | At3g50980 |              |         |        |        |       |                 | 0.35  |          |
| 35   | C   | At3g51810 |              | -2.79   |        | -2.31  |       |                 | 1.67  |          |
| 36   | C   | At3g53040 |              | -4.08   |        |        |       |                 | 1.56  |          |
| 37   | M   | At3g53770 |              |         |        |        |       |                 |       |          |
| 38   | M   | At4g02380 |              | -3.45   |        |        | -1.99 |                 |       |          |
| 39   | C   | At4g13230 |              | 1.6     |        | 0.31   |       |                 |       | -1.3     |
| 40   | C   | At4g13560 |              | 4.16    | -2.06  | 4.7    |       |                 |       | -0.03    |
| 41   | M   | At4g15910 |              | -2.57   |        |        |       |                 |       |          |
| 42   | MP  | At4g21020 |              |         |        |        |       | -2.99           | 0.41  |          |
| 43   | ER  | At4g36600 |              | -2.57   |        | -0.09  |       |                 | 0.81  |          |
| 44   | C   | At4g38410 |              |         |        |        | -0.56 |                 |       |          |
| 45   | C   | At4g39130 |              | -2.79   |        |        |       |                 |       |          |
| 46   | C   | At5g06760 |              | 2.49    | -2.91  | 1.5    |       |                 | 2.02  |          |
| 47   | C   | At5g27980 |              | 1.16    |        | 2.73   | -5.15 |                 |       |          |
| 48   | MP  | At5g44310 |              |         |        |        |       |                 | 0.6   |          |
| 49   | C   | At5g53260 |              |         |        |        |       |                 |       |          |
| 50   | C   | At5g53270 |              |         |        |        |       |                 |       |          |
| 51   | C   | At5g66400 |              | -1.79   | -2.55  |        |       |                 | 2.32  |          |

### Supplemental Figure 15. Proteomic quantification of LEA proteins in different organs of Arabidopsis.

Proteomic data were obtained from the pep2pro database (<http://fgcz-pep2pro.uzh.ch/>) and the subcellular localizations were added from our experimental observations: C, cytosol ; P, plastid ; M, mitochondria ; MP, mitochondria and plastid ; ER, Endoplasmic Reticulum ; V, vacuole ; Pxp, pexophagosome. Values are expressed as Log<sub>2</sub> of spectral counts and normalized (single hits were previously removed). Results were color coded as a function of values from yellow to red with Excel.

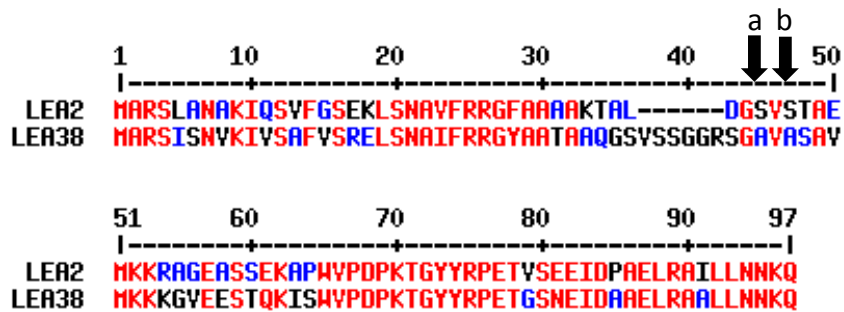

**Supplemental Figure 16. LEA2 and LEA38 sequence alignment.** Sequences were aligned using the MultAlin software (<http://multalin.toulouse.inra.fr/multalin/>) using default parameters. The targeting peptide cleavage sites of LEA38 shown as black arrows were predicted using the MitoProt (a) and TargetP (b) software.

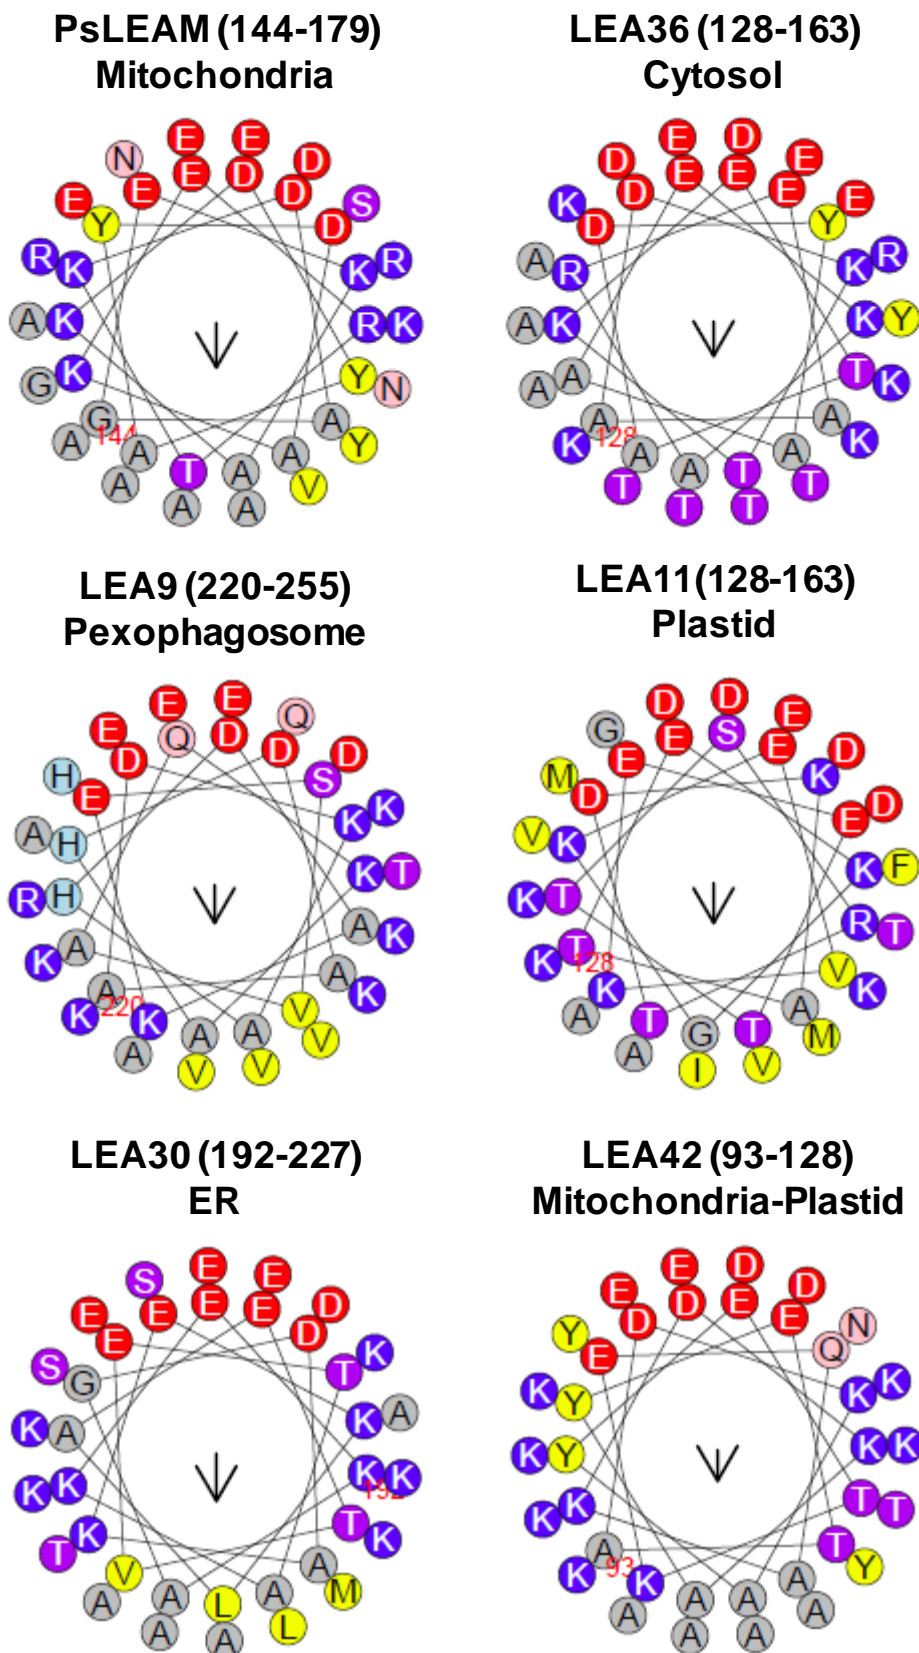

**Supplemental Figure 17. Modeling of class A  $\alpha$ -helix motif of LEA proteins.**

Helical projections of  $\alpha$ -helices were obtained using the HeliQuest webserver (<http://heliquest.ipmc.cnrs.fr/>). Each wheel was obtained with a 36 amino acids window. Residues are color coded with blue for positively (K, R) and red (D, E) for positively charged residues. Non polar residues are shown in yellow or grey, and others in purple, light blue or light pink colors. The arrow shows the hydrophobic moment.

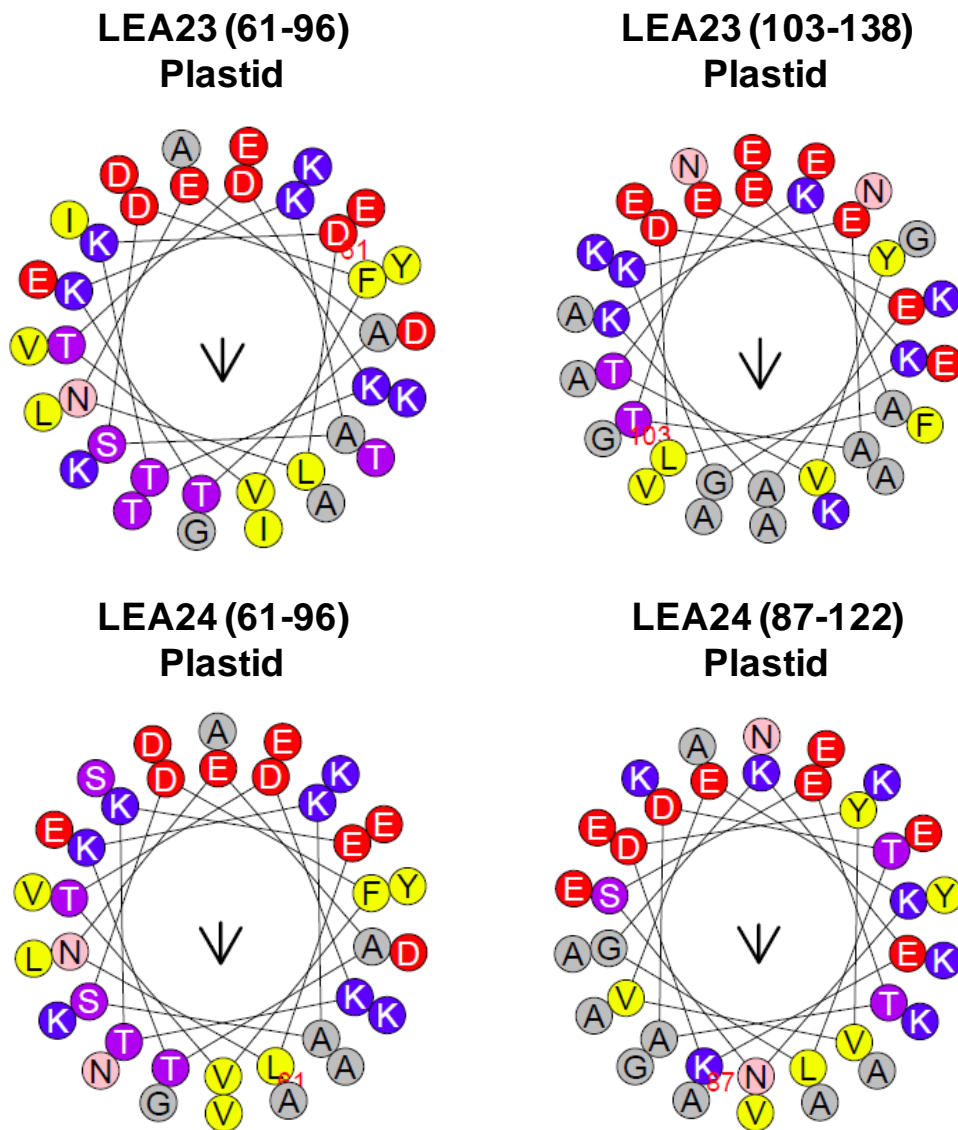

**Supplemental Figure 18. Modeling of class A-like  $\alpha$ -helix motif of LEA23 and LEA24.**

Helical projections of  $\alpha$ -helices were obtained using the HeliQuest webserver

(<http://heliquest.ipmc.cnrs.fr/>).

Each wheel was obtained with a 36 amino acids window. Residues are color coded with blue for positively (K, R) and red (D, E) for positively charged residues. Non polar residues are shown in yellow or grey, and others in purple, light blue or light pink colors. The arrow shows the hydrophobic moment.

**Supplemental Table 1. Theoretical and apparent molecular masses of LEA and fusion proteins.**

| LEA protein | Molecular weight (kDa) | Molecular weight with GFP (kDa) | Molecular weight with GFP deduced from Western blot (kDa) |
|-------------|------------------------|---------------------------------|-----------------------------------------------------------|
| 1           | 16.543                 | 45.169                          | 43.5                                                      |
| 2           | 9.827                  | 38.453                          | 38.5                                                      |
| 3           | 18.941                 | 47.568                          | 51.0                                                      |
| 4           | 29.896                 | 58.523                          | 77.5                                                      |
| 5           | 29.547                 | 58.174                          | 64.0                                                      |
| 6           | 14.890                 | 43.517                          | 44.0                                                      |
| 7           | 18.100                 | 46.727                          | 46.5                                                      |
| 8           | 10.795                 | 39.422                          | 39.0                                                      |
| 9           | 52.703                 | 81.330                          | 80.0                                                      |
| 10          | 20.786                 | 49.412                          | 63.0                                                      |
| 11          | 20.016                 | 48.643                          | 44.0                                                      |
| 12          | 20.578                 | 49.204                          | 45.0                                                      |
| 13          | 49.838                 | 78.464                          | 78.8                                                      |
| 14          | 19.297                 | 47.924                          | 64.0                                                      |
| 15          | 9.712                  | 38.339                          | 39.5                                                      |
| 16          | 8.482                  | 37.108                          | 43.5                                                      |
| 17          | 7.555                  | 36.181                          | 40.5                                                      |
| 18          | 10.480                 | 39.107                          | 40.5                                                      |
| 19          | 48.492                 | 77.119                          | 87.5                                                      |
| 20          | 9.933                  | 38.560                          | 38.5                                                      |
| 21          | 23.887                 | 52.513                          | 56.0                                                      |
| 22          | 11.431                 | 40.058                          | 37.5                                                      |
| 23          | 14.960                 | 43.587                          | 38.0                                                      |
| 24          | 14.605                 | 43.231                          | 39.0                                                      |
| 25          | 67.195                 | 95.821                          | 99.5                                                      |
| 26          | 36.036                 | 64.662                          | 64.0                                                      |
| 27          | 17.846                 | 46.472                          | 48.0                                                      |
| 28          | 7.144                  | 35.771                          | 36.0                                                      |
| 29          | 24.186                 | 52.812                          | 55.5                                                      |
| 30          | 32.559                 | 61.185                          | 63.0                                                      |
| 31          | 26.743                 | 55.370                          | 65.0                                                      |
| 32          | 26.778                 | 55.405                          | 63.0                                                      |
| 33          | 20.909                 | 49.535                          | 50.0                                                      |
| 34          | 13.434                 | 42.061                          | 46.0                                                      |
| 35          | 16.612                 | 45.238                          | 46.5                                                      |
| 36          | 52.084                 | 80.710                          | 85.0                                                      |
| 37          | 14.418                 | 43.044                          | 42.5                                                      |
| 38          | 10.291                 | 38.918                          | 40.0                                                      |
| 39          | 13.063                 | 41.690                          | 43.0                                                      |
| 40          | 11.584                 | 40.210                          | 41.0                                                      |
| 41          | 10.965                 | 39.591                          | 39.5                                                      |
| 42          | 29.422                 | 58.048                          | 57.0                                                      |
| 43          | 37.959                 | 66.585                          | 68.5                                                      |
| 44          | 18.255                 | 46.881                          | 52.0                                                      |
| 45          | 16.259                 | 44.886                          | 48.5                                                      |
| 46          | 16.178                 | 44.805                          | 43.5                                                      |
| 47          | 19.515                 | 48.142                          | 52.0                                                      |
| 48          | 38.451                 | 67.077                          | 63.5                                                      |
| 49          | 18.272                 | 46.898                          | 50.0                                                      |
| 50          | 16.660                 | 45.287                          | 45.0                                                      |
| 51          | 18.463                 | 47.090                          | 53.5                                                      |



**Supplemental Table 2. Quantitative data about transiently transformed protoplasts.**

Exp, independent transformation; FP, fluorescent protoplast number

| LEA | protoplasts<br>number of<br>independant<br>transformation | Exp 1                |    | Exp 2                |    | Exp 3                |    | Exp 4                |    | Exp 5                |    | Total<br>FP |
|-----|-----------------------------------------------------------|----------------------|----|----------------------|----|----------------------|----|----------------------|----|----------------------|----|-------------|
|     |                                                           | Protopl.<br>observed | FP |             |
| 1   | 3                                                         | 25                   | 10 | 67                   | 21 | 38                   | 22 |                      |    |                      |    | 53          |
| 2   | 3                                                         | 45                   | 11 | 34                   | 12 | 108                  | 53 |                      |    |                      |    | 76          |
| 3   | 3                                                         | 44                   | 23 | 10                   | 3  | 46                   | 8  |                      |    |                      |    | 34          |
| 4   | 3                                                         | 17                   | 4  | 10                   | 4  | 96                   | 31 |                      |    |                      |    | 39          |
| 5   | 2                                                         | 125                  | 42 | 147                  | 48 |                      |    |                      |    |                      |    | 90          |
| 6   | 2                                                         | 42                   | 13 | 57                   | 23 |                      |    |                      |    |                      |    | 36          |
| 7   | 3                                                         | 20                   | 7  | 53                   | 22 | 17                   | 6  |                      |    |                      |    | 35          |
| 8   | 3                                                         | 19                   | 6  | 33                   | 15 | 72                   | 26 |                      |    |                      |    | 47          |
| 9   | 5                                                         | 9                    | 2  | 34                   | 6  | 12                   | 4  | 13                   | 4  | 19                   | 4  | 20          |
| 10  | 3                                                         | 32                   | 8  | 57                   | 26 | 126                  | 42 |                      |    |                      |    | 76          |
| 11  | 3                                                         | 56                   | 4  | 28                   | 18 | 99                   | 45 |                      |    |                      |    | 67          |
| 12  | 2                                                         | 35                   | 4  | 68                   | 3  |                      |    |                      |    |                      |    | 7           |
| 13  | 3                                                         | 25                   | 9  | 29                   | 3  | 53                   | 2  |                      |    |                      |    | 14          |
| 14  | 3                                                         | 19                   | 7  | 37                   | 11 | 77                   | 23 |                      |    |                      |    | 41          |
| 15  | 2                                                         | 49                   | 11 | 137                  | 46 |                      |    |                      |    |                      |    | 57          |
| 16  | 2                                                         | 50                   | 9  | 145                  | 48 |                      |    |                      |    |                      |    | 57          |
| 17  | 2                                                         | 50                   | 7  | 154                  | 72 |                      |    |                      |    |                      |    | 79          |
| 18  | 2                                                         | 60                   | 30 | 114                  | 17 |                      |    |                      |    |                      |    | 47          |
| 19  | 2                                                         | 30                   | 5  | 164                  | 15 |                      |    |                      |    |                      |    | 20          |
| 20  | 2                                                         | 38                   | 26 | 147                  | 18 |                      |    |                      |    |                      |    | 44          |
| 21  | 3                                                         | 27                   | 12 | 23                   | 5  | 25                   | 9  |                      |    |                      |    | 26          |
| 22  | 3                                                         | 38                   | 6  | 18                   | 3  | 20                   | 5  |                      |    |                      |    | 14          |
| 23  | 3                                                         | 36                   | 11 | 26                   | 14 | 15                   | 9  |                      |    |                      |    | 34          |
| 24  | 3                                                         | 77                   | 45 | 17                   | 5  | 135                  | 9  |                      |    |                      |    | 59          |
| 25  | 2                                                         | 8                    | 3  | 96                   | 12 |                      |    |                      |    |                      |    | 15          |
| 26  | 2                                                         | 21                   | 5  | 92                   | 7  |                      |    |                      |    |                      |    | 12          |
| 27  | 2                                                         | 47                   | 16 | 170                  | 16 |                      |    |                      |    |                      |    | 32          |
| 28  | 2                                                         | 12                   | 8  | 62                   | 10 |                      |    |                      |    |                      |    | 18          |
| 29  | 3                                                         | 9                    | 8  | 24                   | 5  | 110                  | 11 |                      |    |                      |    | 24          |
| 30  | 3                                                         | 53                   | 7  | 12                   | 4  | 16                   | 2  |                      |    |                      |    | 13          |
| 31  | 3                                                         | 45                   | 30 | 10                   | 5  | 128                  | 11 |                      |    |                      |    | 46          |
| 32  | 3                                                         | 17                   | 7  | 25                   | 12 | 86                   | 9  |                      |    |                      |    | 28          |
| 33  | 3                                                         | 18                   | 5  | 19                   | 12 | 82                   | 2  |                      |    |                      |    | 19          |
| 34  | 3                                                         | 8                    | 5  | 13                   | 7  | 116                  | 14 |                      |    |                      |    | 26          |
| 35  | 2                                                         | 46                   | 12 | 53                   | 3  |                      |    |                      |    |                      |    | 15          |
| 36  | 2                                                         | 5                    | 2  | 104                  | 8  |                      |    |                      |    |                      |    | 10          |
| 37  | 3                                                         | 18                   | 6  | 33                   | 18 | 5                    | 5  |                      |    |                      |    | 29          |
| 38  | 3                                                         | 55                   | 29 | 16                   | 7  | 5                    | 3  |                      |    |                      |    | 39          |
| 39  | 3                                                         | 115                  | 21 | 12                   | 3  | 79                   | 6  |                      |    |                      |    | 30          |
| 40  | 2                                                         | 18                   | 10 | 51                   | 3  |                      |    |                      |    |                      |    | 13          |
| 41  | 3                                                         | 22                   | 7  | 19                   | 7  | 15                   | 7  |                      |    |                      |    | 21          |
| 42  | 2                                                         | 7                    | 5  | 6                    | 4  |                      |    |                      |    |                      |    | 9           |
| 43  | 3                                                         | 4                    | 2  | 13                   | 3  | 32                   | 4  |                      |    |                      |    | 9           |
| 44  | 3                                                         | 14                   | 6  | 11                   | 3  | 88                   | 2  |                      |    |                      |    | 11          |
| 45  | 3                                                         | 39                   | 12 | 19                   | 8  | 58                   | 6  |                      |    |                      |    | 26          |
| 46  | 2                                                         | 14                   | 6  | 38                   | 4  |                      |    |                      |    |                      |    | 10          |
| 47  | 3                                                         | 72                   | 9  | 9                    | 3  | 117                  | 5  |                      |    |                      |    | 17          |
| 48  | 2                                                         | 12                   | 4  | 12                   | 6  |                      |    |                      |    |                      |    | 10          |
| 49  | 3                                                         | 4                    | 3  | 72                   | 21 | 38                   | 4  |                      |    |                      |    | 28          |
| 50  | 2                                                         | 36                   | 18 | 54                   | 5  |                      |    |                      |    |                      |    | 23          |
| 51  | 3                                                         | 32                   | 11 | 13                   | 9  | 69                   | 2  |                      |    |                      |    | 22          |

**Supplemental Table 3. Arabidopsis LEA templates used for PCR amplification.**

| LEA# | Accession number (TAIR) | Template                      | Origin    |
|------|-------------------------|-------------------------------|-----------|
| 1    | At1g01470               | cDNA Arabidopsis seeds        | MPIMP     |
| 2    | At1g02820               | pENTR/SD/D-TOPO (+CDS)        | MPIMP     |
| 3    | At1g03120               | cDNA Arabidopsis seeds        | MPIMP     |
| 4    | At1g20440               | pENTR/SD/D-TOPO (+CDS)        | MPIMP     |
| 5    | At1g20450               | pUNI51 (U24382)               | ABRC      |
| 6    | At1g32560               | pENTR/SD/D-TOPO (+CDS)        | MPIMP     |
| 7    | At1g52690               | pENTR/SD/D-TOPO (+CDS)        | MPIMP     |
| 8    | At1g54410               | pENTR/SD/D-TOPO (+CDS)        | MPIMP     |
| 9    | At1g72100               | pENTR/SD/D-TOPO (+CDS)        | MPIMP     |
| 10   | At1g76180               | pENTR/SD/D-TOPO (+CDS)        | MPIMP     |
| 11   | At2g03740               | pENTR/SD/D-TOPO (+CDS)        | MPIMP     |
| 12   | At2g03850               | pENTR/SD/D-TOPO (+CDS)        | MPIMP     |
| 13   | At2g18340               | cDNA Arabidopsis seeds        | MPIMP     |
| 14   | At2g21490               | pENTR/SD/D-TOPO (+CDS)        | MPIMP     |
| 15   | At2g23110               | pENTR/SD/D-TOPO (+CDS)        | MPIMP     |
| 16   | At2g23120               | pENTR/SD/D-TOPO (+CDS)        | MPIMP     |
| 17   | At2g33690               | pUNI51 (U63047)               | ABRC      |
| 18   | At2g35300               | cDNA Arabidopsis seeds        | MPIMP     |
| 19   | At2g36640               | cDNA Arabidopsis seeds        | MPIMP     |
| 20   | At2g40170               | pENTR/SD/D-TOPO (+CDS)        | MPIMP     |
| 21   | At2g41260               | pUC57 (synthetic gene)        | GenScript |
| 22   | At2g41280               | pENTR/SD/D-TOPO (+CDS)        | MPIMP     |
| 23   | At2g42530               | pENTR/SD/D-TOPO (+CDS)        | MPIMP     |
| 24   | At2g42540               | pENTR/SD/D-TOPO (+CDS)        | MPIMP     |
| 25   | At2g42560               | pENTR/SD/D-TOPO (+CDS)        | MPIMP     |
| 26   | At2g44060               | pUNI51 (U83572)               | ABRC      |
| 27   | At2g46140               | pENTR/SD/D-TOPO (+CDS)        | MPIMP     |
| 28   | At3g02480               | pENTR/SD/D-TOPO (+CDS)        | MPIMP     |
| 29   | At3g15670               | pENTR/SD/D-TOPO (+CDS)        | MPIMP     |
| 30   | At3g17520               | pENTR/SD/D-TOPO (+CDS)        | MPIMP     |
| 31   | At3g22490               | pENTR/SD/D-TOPO (+CDS)        | MPIMP     |
| 32   | At3g22500               | pENTR/SD/D-TOPO (+CDS)        | MPIMP     |
| 33   | At3g50970               | pENTR/SD/D-TOPO (+CDS)        | MPIMP     |
| 34   | At3g50980               | cDNA Arabidopsis seeds        | MPIMP     |
| 35   | At3g51810               | pENTR/SD/D-TOPO (+CDS)        | MPIMP     |
| 36   | At3g53040               | pENTR/SD/D-TOPO (+CDS)        | MPIMP     |
| 37   | At3g53770               | pENTR221 (pENTR221-AT3G53770) | ABRC      |
| 38   | At4g02380               | pENTR/SD/D-TOPO (+CDS)        | MPIMP     |
| 39   | At4g13230               | cDNA Arabidopsis bud          | MPIMP     |
| 40   | At4g13560               | pENTR/SD/D-TOPO (+CDS)        | MPIMP     |
| 41   | At4g15910               | pUNI51 (U23419)               | ABRC      |
| 42   | At4g21020               | pUNI51 (U20045)               | ABRC      |
| 43   | At4g36600               | pUNI51 (S63786)               | ABRC      |
| 44   | At4g38410               | pENTR/SD/D-TOPO (+CDS)        | MPIMP     |
| 45   | At4g39130               | cDNA Arabidopsis seeds        | MPIMP     |
| 46   | At5g06760               | pENTR/SD/D-TOPO (+CDS)        | MPIMP     |
| 47   | At5g27980               | pUC57 (synthetic gene)        | GenScript |
| 48   | At5g44310               | pUNI51 (U66244)               | ABRC      |
| 49   | At5g53260               | pUC57 (synthetic gene)        | GenScript |
| 50   | At5g53270               | cDNA Arabidopsis seeds        | MPIMP     |
| 51   | At5g66400               | pENTR/SD/D-TOPO (+CDS)        | MPIMP     |

**Supplemental Table 4. Primers used for the construction of LEA gene fusions and markers.**

| Sequence | Name   | Forward primer            | Length | Name  | Reverse primer          | Length |
|----------|--------|---------------------------|--------|-------|-------------------------|--------|
| LEA1     | FL1    | CACCATGGCGAGCTTGCTAGAT    | 22     | RL1   | GAAGAAATCTTTAAAAGTAGG   | 21     |
|          | FnoL1  | CACCGCGAGCTTGCTAGATAAA    | 22     | Rsl1  | TCAGAAGAAATCTTTAAAAGT   | 21     |
| LEA2     | FL2    | CACCATGGCTCGTTCTCGCT      | 22     | RL2   | TTGCTTGTGTCAAGAG        | 18     |
|          | FnoL2  | CACCGCTCGTTCTCGCTAAC      | 22     | Rsl2  | TTATTGCTTGTGTCAA        | 18     |
| LEA3     | FL3    | CACCATGGCACAGCATCAGCATT   | 24     | RL3   | GAGTTGTGATTGAGCCT       | 18     |
|          | FnoL3  | CACCGCACAGCATCAGCATTCTCC  | 24     | Rsl3  | CTAGAGTTGTGATTGAGC      | 19     |
| LEA4     | FL4    | CACCATGGCTGAGGAGTACAAG    | 22     | RL4   | ATCATCAGACTCTTTTCTTTC   | 22     |
|          | FnoL4  | CACCGCTGAGGAGTACAAGAAC    | 22     | Rsl4  | TTAATCATCAGACTCTTTTCT   | 22     |
| LEA5     | FL5    | CACCATGGCAGAAGAGTACAAGAAC | 25     | RL5   | ATCAGACACTTTTCTTCTTC    | 22     |
|          | FnoL5  | CACCGCAGAAGAGTACAAGAACC   | 25     | Rsl5  | TTAATCAGACACTTTTCTTTC   | 22     |
| LEA6     | FL6    | CACCATGCAATCGGCGAAACAG    | 22     | RL6   | GTAGTGATGATGATTATGATGTC | 24     |
|          | FnoL6  | CACCAATCGGCGAAACAGAAG     | 22     | Rsl6  | TTAGTAGTATGATGATTATGATG | 24     |
| LEA7     | FL7    | CACCATGGCGTCTCATCAAGAA    | 22     | RL7   | CTTCCTGTGTCTCACG        | 18     |
|          | FnoL7  | CACCGGTCTCATCAAGAACAG     | 22     | Rsl7  | TCACTTCCTGTGTCTC        | 18     |
| LEA8     | FL8    | CACCATGGCAGGACTCATCAAC    | 22     | RL8   | ATCGCTGTCCGTGCTACT      | 18     |
|          | FnoL8  | CACCGCAGGACTCATCAACAAG    | 22     | Rsl8  | TTAATCGCTGTCCGTGCTC     | 18     |
| LEA9     | FL9    | CACCATGACGAATCTTTTGGCC    | 22     | RL9   | ACAAGCGGCGCCGAGTCTCTG   | 21     |
|          | FnoL9  | CACCACGAATCTTTTGGCCTTG    | 22     | Rsl9  | TCAACAAGCGGCGCCGAGTCT   | 21     |
| LEA10    | FL10   | CACCATGGCTGAGGAAATCAAG    | 22     | RL10  | TTCTTTATCTTTCTCTCTCC    | 22     |
|          | FnoL10 | CACCGCTGAGGAAATCAAGAA     | 22     | Rsl10 | TTATCTTTATCTTTCTCTCC    | 22     |
| LEA11    | FL11   | CACCATGTCGATCTCCGGAGCT    | 22     | RL11  | TGCATCAGTTTTGGAGGC      | 19     |
|          | FnoL11 | CACCTCGATCTCCGGAGCTGTG    | 22     | Rsl11 | CTATGCATCAGTTTGGGA      | 19     |
| LEA12    | FL12   | CACCATGGCGATGTCGATCTCC    | 22     | RL12  | AGTTTTGGAGGCATTATAGC    | 21     |
|          | FnoL12 | CACCGCGATGTCGATCTCCGGA    | 22     | Rsl12 | TTAAGTTTTGGAGGCATTAT    | 21     |
| LEA13    | FL13   | CACCATGATGGAGAGAAGAAGAA   | 24     | RL13  | GAGCTCAGCATAACGGC       | 18     |
|          | FnoL13 | CACCATGGAGAGAAGAAGAACGG   | 23     | Rsl13 | TTAGAGCTCAGCATAAGC      | 18     |
| LEA14    | FL14   | CACCATGGCGGATTTGAGGGAC    | 22     | RL14  | TGGGTGTTGTGTTTATG       | 18     |
|          | FnoL14 | CACCGCGGATTTGAGGGACGAA    | 22     | Rsl14 | TCATGGGTGTTGTGGTT       | 18     |
| LEA15    | FL15   | CACCATGGAGGATCAGAAAAAGCC  | 24     | RL15  | CGGAACCCCTGACGGTT       | 18     |
|          | FnoL15 | CACCGAGGATCAGAAAAAGCCACC  | 24     | Rsl15 | TCACGGAACCCCTGACG       | 18     |
| LEA16    | FL16   | CACCATGGAGGCCGGAAAAACA    | 22     | RL16  | CGGAGCTTCCGATCGGT       | 18     |
|          | FnoL16 | CACCGAGGCCGGAAAAACCA      | 22     | Rsl16 | TCACGGAGCTTCCGATC       | 18     |
| LEA17    | FL17   | CACCATGTGGAAGAGTGAAGAGAA  | 24     | RL17  | CTTCTTAGCTTTTGGTTAGCG   | 22     |
|          | FnoL17 | CACCTCGAAGAGTGAAGAGAAACA  | 24     | Rsl17 | TCACTTCTTAGCTTTTGGTTA   | 22     |
| LEA18    | FL18   | CACCATGCAGTCGGCGAAGGAA    | 22     | RL18  | GATCTGTCCCGCGGGTA       | 18     |
|          | FnoL18 | CACCCAGTCGGCGAAGGAAAG     | 22     | Rsl18 | TTAGATCTGTCCCGCGG       | 18     |
| LEA19    | FL19   | CACCATGGCGTCAGACAAAACAAA  | 24     | RL19  | CAGCTTCCCTTATCTTCC      | 20     |
|          | FnoL19 | CACCGCGTCAGACAAAACAAAGGC  | 24     | Rsl19 | TCACAGCTTCCCTTATCTT     | 20     |
| LEA20    | FL20   | CACCATGGCGTCTCAACAAGAG    | 22     | RL20  | GGTCTTGGTCTGAATTTGG     | 20     |
|          | FnoL20 | CACCGGTCTCAACAAGAGAG      | 22     | Rsl20 | TTAGGTCTTGGCTGAATT      | 20     |
| LEA21    | FL21   | CACCATGGGAAACCTCAAGTCTC   | 23     | RL21  | TGGCTTAGCTTGTGGGC       | 18     |
|          | FnoL21 | CACCGGAAACCTCAAGTCTCTCG   | 23     | Rsl21 | TCATGGCTTAGCTTGTGG      | 19     |
| LEA22    | FL22   | CACCATGGGAAACCTCATGTCT    | 22     | RL22  | TGGCTTAGCTTCTTCC        | 18     |
|          | FnoL22 | CACCGGAAACCTCATGTCTCTC    | 22     | Rsl22 | TCATGGCTTAGCTTCTTCC     | 19     |
| LEA23    | FL23   | CACCATGGCGATGCTTTATCAGG   | 24     | RL23  | GGACTTTGTGGCATTCTAG     | 20     |
|          | FnoL23 | CACCGCGATGCTTTATCAGGAGC   | 24     | Rsl23 | TCAGGACTTTGTGGCATTCT    | 20     |
| LEA24    | FL24   | CACCATGGCGATGCTTTCTCAGG   | 24     | RL24  | CTTTGTGCCATCCTTAGC      | 18     |
|          | FnoL24 | CACCGCGATGCTTTCTCAGGAGC   | 24     | Rsl24 | CTACTTTGTGCCATCCTT      | 18     |
| LEA25    | FL25   | CACCATGGCGTCAGAGCAAGCA    | 22     | RL25  | ACGTTGTCCATGTTCCCG      | 18     |
|          | FnoL25 | CACCGCGTCAGAGCAAGCAAGG    | 22     | Rsl25 | TCAACGTTGTCCATGTTCC     | 18     |
| LEA26    | FL26   | CACCATGTCGACATCTGAGGATAA  | 24     | RL26  | TTCTCATCGTCGTCATC       | 18     |
|          | FnoL26 | CACCTCGACATCTGAGGATAAACC  | 24     | Rsl26 | TTATTCCTCATCGTCGTC      | 18     |
| LEA27    | FL27   | CACCATGGCATCAGCGGATGAA    | 22     | RL27  | AAAGAAGTCGGAAGGGA       | 18     |
|          | FnoL27 | CACCGCATCAGCGGATGAAAAG    | 22     | Rsl27 | TTAAAAGAAGTCGGAAG       | 18     |
| LEA28    | FL28   | CACCATGGACAACAAGCAAAACGC  | 24     | RL28  | GTGGCTTTTGTTCATGCC      | 18     |
|          | FnoL28 | CACCGACAACAAGCAAAACGCGAG  | 24     | Rsl28 | TTAGTGGCTTTTGTTCAT      | 18     |
| LEA29    | FL29   | CACCATGGCATCCAACCAACAG    | 22     | RL29  | CTTCCTGTGATAAGTCTGATGA  | 22     |
|          | FnoL29 | CACCGCATCCAACCAACAGAGC    | 22     | Rsl29 | TCACTTCTGTGATAAGTCTGA   | 22     |
| LEA30    | FL30   | CACCATGGGTTAGAGAGGAAA     | 22     | RL30  | GAGCTCAGCATCATGCTC      | 18     |
|          | FnoL30 | CACCGGTTAGAGAGGAAAAGTG    | 22     | Rsl30 | TCAGAGCTCAGCATCATC      | 18     |
| LEA31    | FL31   | CACCATGAGTCAAGAAGAACAACC  | 24     | RL31  | TATATCAGCTCTCTGTTAAGC   | 22     |
|          | FnoL31 | CACCAAGTCAAGAAGAACAACCAA  | 24     | Rsl31 | TCATATATCAGCTCTCTGTTA   | 22     |
| LEA32    | FL32   | CACCATGAGCCAAAGCAACCA     | 22     | RL32  | TATATCAACTCTCTGTTAAGC   | 22     |
|          | FnoL32 | CACCAAGCCAAAGCAACCAAGG    | 22     | Rsl32 | TCATATATCAACTCTCTGTTA   | 22     |
| LEA33    | FL33   | CACCATGAATTCTACCAGAATCA   | 24     | RL33  | GTGATGACCACCGGGAAG      | 18     |
|          | FnoL33 | CACCAATTCTACCAGAATCAAAC   | 24     | Rsl33 | CTAGTGATGACCACCGGG      | 18     |
| LEA34    | FL34   | CACCATGGAGTCTTACAAAACCC   | 23     | RL34  | ATGATGACCACCGGAAG       | 18     |
|          | FnoL34 | CACCGAGTCTTACAAAACCCAG    | 22     | Rsl34 | CTAATGATGACCACCGGG      | 18     |
| LEA35    | FL35   | CACCATGGCGTCAAAGCAACTG    | 22     | RL35  | CTTGTGGTGAACCTTGA       | 21     |
|          | FnoL35 | CACCGCGTCAAAGCAACTGAGC    | 22     | Rsl35 | TCACTTGTGGTGAACCTTGA    | 21     |
| LEA36    | FL36   | CACCATGGCATCAGGACAACGG    | 22     | RL36  | CAGCTTTTCTCTCCAC        | 18     |
|          | FnoL36 | CACCGCATCAGGACAACGGGAG    | 22     | Rsl36 | CTACAGCTTTTCTCTCC       | 18     |

|                    |                |                                                       |          |                 |                                                    |          |
|--------------------|----------------|-------------------------------------------------------|----------|-----------------|----------------------------------------------------|----------|
| LEA37              | FL37<br>FnoL37 | CACCATGTCTCAATCACTTTTCAA<br>CACCTCTCAATCACTTTTCAATCT  | 24<br>24 | RL37<br>RsL37   | GCTCACTACGTACGTCTTTTG<br>TTAGCTCACTACGTACGTCTT     | 21<br>21 |
| LEA38              | FL38<br>FnoL38 | CACCATGGCTCGTTCTATCTCTAA<br>CACCGCTCGTTCTATCTCTAACGT  | 24<br>24 | RL38<br>RsL38   | CTGCTTGTGTTCAAGAGAGC<br>TCACTGCTGTTGTTCAAGAG       | 21<br>21 |
| LEA39              | FL39<br>FnoL39 | CACCATGACAAGCTTCGCGGTC<br>CACCACAAGCTTCGCGGTCGTTG     | 22<br>23 | RL39<br>RsL39   | TTTGAGGTTCTTGGTGTTT<br>TTATTTGAGGTTCTTGGTG         | 19<br>19 |
| LEA40              | FL40<br>FnoL40 | CACCATGTCGCAACAACAATTC<br>CACCTCGCAACAACAATTC AAC     | 22<br>22 | RL40<br>RsL40   | TTTCTTCTCGTTCAATGCC<br>TCATTTCTTCTCGTTCAAT         | 18<br>18 |
| LEA41              | FL41<br>FnoL41 | CACCATGGCCGCTCGTTCACTC<br>CACCGCCGCTCGTTCACTCTCC      | 22<br>22 | RL41<br>RsL41   | GAAAGACTTTGCTTTGTTTTTC<br>TCAGAAAGACTTTGCTTTGTTT   | 22<br>22 |
| LEA42              | FL42<br>FnoL42 | CACCATGGCGCCATGCAACTAAC<br>CACCGCGCCATGCAACTAACAG     | 24<br>24 | RL42<br>RsL42   | GTTAAATGTTATGAAATCGTCC<br>TCAGTTAAATGTTATGAAATCGTC | 22<br>24 |
| LEA43              | FL43<br>FnoL43 | CACCATGATGCTTACGACGGTG<br>CACCATGCTTACGACGGTGTTG      | 22<br>22 | RL43<br>RsL43   | AAGCTCAGCGCTACGGTC<br>CTAAAGCTCAGCGCTACG           | 18<br>18 |
| LEA44              | FL44<br>FnoL44 | CACCATGGCGGATCATCTCTCGT<br>CACCGCGGATCATCTCTCTCTC     | 22<br>22 | RL44<br>RsL44   | GGTTTCCTTCTTCTCTCATC<br>CTAGGTTTCCTTCTCTCTCTC      | 21<br>21 |
| LEA45              | FL45<br>FnoL45 | CACCATGGCGGATCTGAAAGAC<br>CACCGCGGATCTGAAAGACGAA      | 22<br>22 | RL45<br>RsL45   | AAGATCATTATGGTGCC<br>TCAAAGATCATTATGGTG            | 18<br>18 |
| LEA46              | FL46<br>FnoL46 | CACCATGCAGTCGATGAAAGAA<br>CACCCAGTCGATGAAAGAAACA      | 22<br>22 | RL46<br>RsL46   | TCCAGTATATCCCCCGCC<br>TTATCCAGTATATCCCCC           | 18<br>18 |
| LEA47              | FL47<br>FnoL47 | CACCATGAGCGAAGAACAGCTG<br>CACCGCGAAGAACAGCTGCAG       | 22<br>22 | RL47<br>RsL47   | TTTGGACTGATTGATCCG<br>TCATTTGGACTGATTGAT           | 18<br>18 |
| LEA48              | FL48<br>FnoL48 | CACCATGGCGGCTATGCAGTTAACG<br>CACCGCGGCTATGCAGTTAACGAG | 25<br>24 | RL48<br>RsL48   | GAACCTCTTGAAATCATCATCC<br>TTAGAACCTCTTGAAATCATCATC | 22<br>24 |
| LEA49              | FL49<br>FnoL49 | CACCATGGGTTTCATCAAAGATAG<br>CACCGTTTCATCAAAGATAGTGC   | 24<br>24 | RL49<br>RsL49   | AAGAGACGATGGATCGTG<br>TCAAAGAGACGATGGATCG          | 18<br>19 |
| LEA50              | FL50<br>FnoL50 | CACCATGATGTTCCGGTTCGGC<br>CACCATGTTCCGGTTCGGCCTT      | 22<br>22 | RL50<br>RsL50   | AAGAGATACATTGCATGG<br>TCAAAGAGATACATTGCA           | 18<br>18 |
| LEA51              | FL51<br>FnoL51 | CACCATGGCGTCTTACCAGAAC<br>CACCGCGTCTTACCAGAACCGT      | 22<br>22 | RL51<br>RsL51   | ACGGCCACCACCGGGAAG<br>TTAACGGCCACCACCGGG           | 18<br>18 |
| U16034 (At3g10920) | MSD1-F         | CACCATGGCGATTTCGTTGTGTAGC                             | 24       | MSD1-R          | GTTGTTTTCTTCTCATAAACCTC                            | 24       |
| U12392 (At4g05180) | PsbQ-F         | CACCATGGCTCAAGCAGTGACTTCG                             | 25       | PsbQ-R          | ACCGAGCTTGGAAGAATGTTT                              | 25       |
| U13389 (At5g38430) | RBCS1B-F       | CACCATGGCTTCTCTATGCTCT                                | 23       | RBCS1B-R        | AGCATCAGTGAAGCTTGG                                 | 18       |
| p2FGW7             | FpGX           | GCGAAACCTATAAGAACC                                    | 19       | RpGX            | ACCACTACCAGCAGAACA                                 | 18       |
| p2GWF7             | FpXG           | GTGGTGCAGATGAACTTCAG                                  | 20       | RpXG<br>RevEGFP | GCACAATCCCACTATCCTTC<br>TACTTGTACAGCTCGTCCAT       | 20<br>21 |
| p2GWR7             | RFP-F          | CACCATGGAGGGCTCCGTGAACGG                              | 24       | RevRFP          | TTAGGCGCCGGTGGAGTGCC                               | 20       |
|                    | NLS-F          | CACCATGCCACCAAAAAGAAAAGAGTT                           | 31       | NLS-R           | AACCTTCTTTTCTTTTGGTGGCAT                           | 27       |
| PDHA1 (NM_000284)  | PDHE1-F        | ATGAGGAAGATGCTCGCC                                    | 18       | PDHE1t-R        | CCTGGTGAGCACTGTTGTGA                               | 20       |
